23 **ABSTRACT**

24 **Sulfur, most abundantly found in the environment as sulfate ( $\text{SO}_4^{2-}$ ), is an essential element**  
25 **in metabolites required by all living cells, including amino acids, co-factors and vitamins.**  
26 **Current understanding of the cellular delivery of  $\text{SO}_4^{2-}$  at the molecular level is limited**  
27 **however. CysZ has been described as a  $\text{SO}_4^{2-}$  permease, but its sequence family is without**  
28 **known structural precedent. Based on crystallographic structure information,  $\text{SO}_4^{2-}$**   
29 **binding and uptake experiments in cells and proteoliposomes, and single-channel**  
30 **conductance measurements, we provide insight into the molecular mechanism of CysZ-**  
31 **mediated translocation of  $\text{SO}_4^{2-}$  across membranes. CysZ properties differ markedly from**  
32 **those of known transporters and ion channels. The structures display a hitherto unknown**  
33 **fold with dual topology, assembling in CysZ from *Pseudomonas denitrificans* as a trimer of**  
34 **antiparallel dimers in the membrane. CysZ structures from two other species recapitulate**  
35 **dimers from this assembly. Mutational studies highlight the functional relevance of**  
36 **conserved CysZ residues.**

37

38 Sulfur has a central role in many cellular processes across all kingdoms of life. It is a vital  
39 component of several essential compounds, including the sulfur-containing amino acids cysteine  
40 and methionine, in prosthetic groups such as the Fe-S clusters, as well as vitamins and  
41 micronutrients such as biotin (vitamin H), thiamine (vitamin B1) and lipoic acid, and in  
42 coenzymes A and M (Barton, 2005). Whilst mammals obtain the majority of the necessary  
43 sulfur-containing metabolites directly from the diet, plants, fungi, and bacteria are able to  
44 assimilate and utilize sulfur from organic and inorganic sources (Barton, 2005). Sulfate ( $\text{SO}_4^{2-}$ ) is  
45 the most abundant source of sulfur in the environment and its utilization is contingent upon its

46 entry into the cell (Kertesz, 2000). In certain fungi, and prokaryotes, once internalized,  $\text{SO}_4^{2-}$  is  
47 first reduced to sulfite ( $\text{SO}_3^{2-}$ ), and then further to sulfide ( $\text{S}^{2-}$ ), a form that can be used by the  
48 cell (Kredich, Hulanicka, & Hallquist, 1979) (Fig. 1-S1). In *Escherichia coli* and other gram-  
49 negative bacteria, the culmination of the aforementioned sulfate assimilatory (also known as  
50 reductive) pathway is the formation of cysteine by the addition of  $\text{S}^{2-}$  to O-acetylserine by  
51 cysteine synthase, followed by the synthesis of methionine from homocysteine (Kredich, 1971)  
52 (Fig. 1-S1).

53

54 In prokaryotes, the entry of  $\text{SO}_4^{2-}$  into the cell is mediated by four known families of dedicated  
55 transport systems: the ABC sulfate transporter complexes SulT or CysTWA, the SulP family of  
56 putative SLC13 sodium:sulfate or proton:sulfate symporters or SLC26 solute:sulfate exchangers,  
57 the phosphate transporter-like CysP/PitA family, and the CysZ family classified as  $\text{SO}_4^{2-}$   
58 permeases (Aguilar-Barajas, Diaz-Perez, Ramirez-Diaz, Riveros-Rosas, & Cervantes, 2011;  
59 Hryniewicz, Sirko, Palucha, Bock, & Hulanicka, 1990; Kertesz, 2001; Loughlin, Shelden,  
60 Tierney, & Howitt, 2002; Mansilla & de Mendoza, 2000; Sirko, Zatyka, Sadowy, & Hulanicka,  
61 1995). CysZ family members are 28-30 kDa bacterial inner-membrane proteins found  
62 exclusively in prokaryotes with no apparent homology to any of the established channel or  
63 transporter folds, and are scarcely studied in the literature (Zhang, Jiang, Nan, Almqvist, &  
64 Huang, 2014). The *cysZ* gene owes its name to its presence in the cysteine biosynthesis regulon.  
65 In two reports from thirty years ago, an *E. coli* K12 strain with a *cysZ* deletion showed a severe  
66 impairment in its ability to accumulate  $\text{SO}_4^{2-}$  and was not viable in sulfate-free media without an  
67 alternate sulfur source such as thiosulfate ( $\text{S}_2\text{O}_3^{2-}$ ) (Britton et al., 1983; Parra, Britton, Castle,  
68 Jones-Mortimer, & Kornberg, 1983). Recently, a third report studying the functional properties

69 of CysZ, concluded that the protein from *E. coli* functions as a high affinity, highly specific pH-  
70 dependent  $\text{SO}_4^{2-}$  transporter, directly regulated by the toxic, assimilatory pathway intermediate,  
71  $\text{SO}_3^{2-}$  (Zhang et al., 2014).

72  
73 To investigate the role of CysZ in cellular sulfate uptake at a molecular level, we have  
74 undertaken an approach that combines structural and functional studies. To this end, we  
75 determined the crystal structures of CysZ from three species, *Idiomarina loihiensis* (Il; IlCysZ),  
76 *Pseudomonas fragi* (Pf; PfCysZ), and *Pseudomonas denitrificans* (Pd; PdCysZ), and  
77 characterized CysZ function in purified form, in reconstituted proteoliposomes, in planar lipid  
78 bilayers, and in cells. Combining the structural information from the three orthologs reveals that  
79 CysZ features a novel protein fold that assembles as oligomers with a dual topology. This  
80 arrangement can be understood as being derived from trimers of dimers akin to the hexameric  
81 assembly captured in one of the structures. Interpreting the functional data in a structural context  
82 has allowed us to formulate a mechanistic model for CysZ-mediated  $\text{SO}_4^{2-}$  translocation across  
83 the bacterial cytoplasm membrane.

84  
85 Both the structures and the functional properties of CysZ proteins are distinct from those of any  
86 known membrane transporter or ion channel. Besides not resembling other transporter structures,  
87 CysZ mediates sulfate uptake into cells or proteoliposomes without coupling to ion gradients,  
88 partner proteins, or exogenous energy sources such as ATP. Besides differing from other ion  
89 channel structures, CysZ generates sulfate currents across lipid bilayers with unusual  
90 characteristics. These distinctive properties make CysZ appealing as a model system for studies  
91 of biophysical principles of membrane protein biogenesis and transmembrane ion passage.

92

## 93 **RESULTS**

### 94 **Structure determination of CysZ**

95 Following a structural genomics approach aimed at crystallization for structural analysis, we  
96 cloned and screened a total of 63 different bacterial homologs of CysZ for high-level expression  
97 and stability in detergents (Love et al., 2010; Mancina & Love, 2011). Crystal structures were  
98 determined for CysZ from three organisms. Chronologically, the structure of *IICysZ* was the first  
99 solved, to 2.3 Å resolution in space group *C2* by SAD, initially based on a single selenate ion  
100 bound to the protein and subsequently also by selenomethione derivatization (SeMet) SAD, and  
101 multi-crystal native SAD (Liu et al., 2012). The structure of *PfCysZ* was solved second, to 3.5 Å  
102 resolution, with crystals also belonging to space group *C2*. Although *PfCysZ* and *IICysZ* share  
103 42% sequence identity, molecular replacement failed to find a convincing solution, and we  
104 instead used SeMet-derivatized *PfCysZ* to obtain phase information by multi-crystal SeMet  
105 SAD. Third, we determined the structure of *PdCysZ*, which crystallized in multiple forms  
106 belonging to space groups *P6<sub>3</sub>*, *P4<sub>1</sub>22* and *P2<sub>1</sub>2<sub>1</sub>2<sub>1</sub>*, revealing the same architecture and  
107 oligomeric assembly each time (Fig. 1-S2b). *PdCysZ* structures in the *P6<sub>3</sub>* and *P2<sub>1</sub>2<sub>1</sub>2<sub>1</sub>* lattices  
108 each contain an entire hexamer in their asymmetric units, whereas a molecular diad coincides  
109 with a crystallographic axis in the *P4<sub>1</sub>22* lattice. We focused our analysis on the best of these  
110 (3.4 Å resolution in *P6<sub>3</sub>*). The location of the selenium sites was obtained from a SeMet SAD  
111 data set, and the structure was solved by combining the resulting SAD phases with those from a  
112 molecular replacement solution obtained by positioning the *PfCysZ* model (75% sequence  
113 identity) onto SeMet fiducials in the initial electron density map (Table 1, Fig. 1-S2a).

114

## 115 **The hexameric structure of *PdCysZ***

116 The refined structure of *PdCysZ* comprises an entire hexamer of near-perfect D3 symmetry.  
117 Antiparallel pairs of protomers arrange together as a trimer of dimers (Fig. 1a), with the three-  
118 fold axis oriented perpendicular to the plane of the putative membrane and three two-fold axes  
119 between dimers of the hexamer. Both the periplasmic and cytoplasmic faces of the hexamer are  
120 essentially identical by symmetry, resulting in a dual-topology assembly for *PdCysZ*. The  
121 hexamer has a triangular face of equal sides measuring approximately 75 Å, with the  
122 perpendicular span of about 65 Å. The interaction of the six protomers results in a total buried  
123 surface area (Krissinel & Henrick, 2007) of 5,700 Å<sup>2</sup>. A surface electrostatic representation  
124 reveals a hydrophobic belt along the mid-section of the hexamer when viewed from its side,  
125 outlining the orientation of CysZ in the lipid bilayer (Czodrowski, Dramburg, Sottriffer, & Klebe,  
126 2006; Dolinsky et al., 2007; Dolinsky, Nielsen, McCammon, & Baker, 2004) (Fig. 1b). A surface  
127 representation of the sequence conservation, calculated by analysis of multiple sequence  
128 alignments (MSA) (Ashkenazy et al., 2016; Glaser et al., 2003) highlights the regions of  
129 invariance in the sequence and in turn, the areas on the molecule that are most likely to have  
130 structural and functional importance (Fig. 1c).

131  
132 The CysZ protomer is an alpha-helical integral membrane protein with two long transmembrane  
133 (TM) helices (H2b and H3a) and two pairs of shorter helices (H4b-H5a and H7-H8) that insert  
134 only partially into the membrane (hemi-penetrating), forming a funnel or tripod-like shape within  
135 the membrane (Fig. 2a, b). The protein has an extra-membranous hydrophilic ‘head’, comprising  
136 an iris-like arrangement of the two short helices, H1 and H6, and kinked helices H3b, H4a, and  
137 H5b. The amino and carboxyl termini are also located in this region (Fig. 2a, b). H4b and H5a lie

138 partly inserted in the membrane, with the turn between the two helices pointing in towards the  
139 three-fold axis at the center of the hexamer. CysZ amino-acid sequences from different  
140 organisms are very similar; for example, those of *PdCysZ* and *E. coli* CysZ (*EcCysZ*) are 40.5%  
141 identical and those of *EcCysZ* and our three structures have 30.0% of their residues exactly in  
142 common (Fig. 2c). Helix boundaries are also essentially the same in the structures of *PdCysZ*,  
143 *IICysZ* and *PfCysZ* (Fig. 2c).

144

### 145 **The dimeric assembly of *IICysZ* and *PfCysZ***

146 Unlike *PdCysZ*, both *IICysZ* and *PfCysZ* crystallize as dimers (Fig. 3a, b), in agreement with  
147 their different behavior in detergent-containing solution. Indeed, size-exclusion chromatography  
148 runs of the three species of CysZ in the same buffer and detergent conditions, show mono-  
149 disperse peaks eluting at 13.42 ml (*IICysZ*), 13.95 ml (*PfCysZ*) and 12.56 ml (*PdCysZ*) (Fig. 3-  
150 S1). This result is consistent with a different and smaller oligomeric state of *IICysZ* and *PfCysZ*  
151 (similar retention volume) compared to *PdCysZ* (eluting 1 ml ahead).

152

153 The protomers of the *IICysZ* dimer are arranged in a head-to-tail antiparallel association, with  
154 H4b-H5a protruding at an angle that is nearly parallel to the putative plane of the membrane  
155 (Fig. 3a, 3-S2a, b). The *PfCysZ* dimer is also arranged in an antiparallel orientation but with a  
156 different dimer interface (Fig. 3b). In the *PfCysZ* structure, H4b-H5a together form a narrower  
157 angle with H2 and H3, and tuck-in closer to the rest of the molecule (Fig. 3b). The resulting  
158 dumbbell-shaped *PfCysZ* dimer is predicted, by OPM/PPM (Orientation of Proteins in  
159 Membranes) (Lomize, Pogozheva, Joo, Mosberg, & Lomize, 2012), to lie in the membrane at a  
160 31° tilt to the perpendicular, in agreement with the position of its central hydrophobic belt, as

161 revealed by surface-electrostatics calculations (Fig. 3- S2e, f). The dimer interfaces of *IICysZ* and  
162 *PfCysZ* bury 780 Å<sup>2</sup> and 1136 Å<sup>2</sup> of surface area respectively (Krissinel & Henrick, 2007)

163  
164 The individual protomers of CysZ from all three species adopt the same topology and fold, and  
165 superpose well with an overall pairwise root mean squared deviation (r.m.s.d) of ~2.5 Å (Fig.  
166 3c). The greatest variation between the protomers of each structure is seen in the orientation of  
167 H4b-H5a with respect to the TM helices, H2 and H3 (Fig. 3c), which seem to be the most  
168 conformationally flexible with respect to the rest of the molecule.

169  
170 Comparison of the structures of *IICysZ* and *PfCysZ* with that of *PdCysZ* revealed that these two  
171 distinctive dimeric structures are both represented in the hexameric one. Indeed, the *IICysZ*  
172 dimer (Fig. 3a) resembles the vertically arranged pair of protomers in the *PdCysZ* hexamer (Fig.  
173 3d) at each of the vertices of the triangular structure. On the other hand, the *PfCysZ* dimer (Fig.  
174 3b) resembles the transverse pair of protomers lying at a tilt, just as was predicted by OPM  
175 (Lomize et al., 2012), along the side of the *PdCysZ* hexamer when viewed from inside the plane  
176 of the membrane (Fig. 3e). In essence, the *PdCysZ* hexamer can be seen as a trimer of either  
177 *IICysZ* or *PfCysZ* dimers (Fig. 3f).

178  
179 **Dual-topology assembly of CysZ**

180 To validate the dual-topology assembly of CysZ observed in all our structures, we performed  
181 disulfide crosslinking assays on engineered cysteine mutants of CysZ designed to capture the  
182 antiparallel dimer, utilizing isolated membranes. Disulfide-trapping experiments of the  
183 transverse dimer, performed by crosslinking a pair of mutants (L161C-A164C) on H5 of *PfCysZ*,



184 as well as the corresponding pair in *IICysZ* (V157C-Q163C) confirm the dimer interface  
185 observed in the structures of *PfCysZ* and *IICysZ*, and, as a consequence, the dual-topology  
186 assembly of the two proteins (Fig. 3-S2f, g, h).

187  
188 To further validate the dual-topology orientation of *CysZ* in the membrane, we performed a  
189 cysteine accessibility scan experiment, mapping residues expected to be located outside the lipid  
190 bilayer, by fluorescence labeling of the thiol groups of various single cysteine mutants with a  
191 membrane-impermeable dye. Membrane fractions isolated from recombinant cultures expressing  
192 *IICysZ* cysteine mutants introduced at positions along the edge of helix H4 predicted to be  
193 solvent accessible based on our structure, were indeed labeled with a membrane-impermeable  
194 fluorescent thiol-specific maleimide dye (Fig. 3-S2c, d).

195

### 196 **Functional characterization of *CysZ***

197 To characterize the functional properties of *CysZ*, we used a four-pronged approach: (i)  
198 radiolabeled [<sup>35</sup>S]O<sub>4</sub><sup>2-</sup> uptake experiments in cells expressing plasmid-encoded *CysZ*, (ii)  
199 radiolabeled ([<sup>35</sup>S]O<sub>4</sub><sup>2-</sup>) binding to purified *CysZ* in detergent solution, (iii) [<sup>35</sup>S]O<sub>4</sub><sup>2-</sup> uptake in  
200 proteoliposomes reconstituted with purified *CysZ*, and (iv) single-channel electrophysiological  
201 recordings in a planar lipid bilayer reconstituted with *CysZ*.

202 First, we compared the time course of SO<sub>4</sub><sup>2-</sup> accumulation in an *E. coli cysZ* knockout strain (*E.*  
203 *coli* K12 JW2406-1, *CysZ*<sup>-</sup>) (Baba et al., 2006) with that in the wild-type (WT, *E. coli* K12  
204 BW25113, *cysZ*<sup>+</sup>) strain. *CysZ*<sup>-</sup> cells, after growth in minimal media and 12 hours of sulfate  
205 starvation, showed significantly diminished SO<sub>4</sub><sup>2-</sup> uptake when compared to the WT strain,  
206 consistent with previous results (Fig. 4a) (Parra et al., 1983). The *CysZ*<sup>-</sup> strain still showed a low

207 level of sulfate accumulation, which could be attributed to the other endogenous sulfate transport  
208 systems present in the bacteria (for example ABC transporter and SulP). This uptake-deficient  
209 phenotype of the *CysZ* cells could be rescued by plasmid-driven expression of *PdCysZ* (Fig.  
210 4b), as well as *IICysZ* and *PfCysZ* (data not shown). Consistent with previously reported data  
211 (Zhang et al., 2014), we observed that  $\text{SO}_3^{2-}$  ions severely impede or block the accumulation of  
212  $[\text{}^{35}\text{S}]\text{O}_4^{2-}$  by *CysZ*-expressing cells (Fig. 4b).

213

214 To further characterize the interaction of *CysZ* with both  $\text{SO}_4^{2-}$  and  $\text{SO}_3^{2-}$ , we performed binding  
215 experiments on purified *PdCysZ* using the scintillation proximity assay (SPA) (Quick & Javitch,  
216 2007). To determine the concentration of half-maximal binding ( $EC_{50}$ ), we isotopically diluted  
217  $[\text{}^{35}\text{S}]\text{O}_4^{2-}$  with non-labeled  $\text{SO}_4^{2-}$ , obtaining an  $EC_{50}$  of  $0.81 \pm 0.045 \mu\text{M}$  (Fig. 4c). Competing  
218 binding of  $[\text{}^{35}\text{S}]\text{O}_4^{2-}$  with  $\text{SO}_3^{2-}$  revealed that *PdCysZ* binds  $\text{SO}_3^{2-}$  with greater affinity as reflected  
219 by a half-maximum inhibition constant ( $IC_{50}$ ) of  $0.12 \pm 0.034 \mu\text{M}$ .

220

221 Next, we conducted  $[\text{}^{35}\text{S}]\text{O}_4^{2-}$  uptake experiments on detergent solubilized and purified *CysZ*  
222 reconstituted in proteoliposomes. Proteoliposomes provide a means for assessing the activity of a  
223 membrane protein independent of other proteins found natively in cellular expression systems.  
224 Such binding partners could be involved in  $\text{SO}_4^{2-}$  uptake as measured in intact *E. coli* cells (Fig.  
225 4a). Furthermore, in addition to the SPA measurements, these experiments allowed us to confirm  
226 that the detergent-based extraction from the membrane and purification of *CysZ* used for our  
227 crystallization approaches did not compromise its activity. Acting alone, *PdCysZ* in  
228 proteoliposomes mediated the accumulation of  $\text{SO}_4^{2-}$  in a time-dependent manner; the uptake  
229 occurred rapidly, peaking at about 30 seconds after incubation with the radioligand (Fig. 4d).

230 Consistent with our observations on cells, the influx of sulfate was inhibited by the presence of  
231  $\text{SO}_3^{2-}$  at micromolar concentrations. *IICysZ* and *PfCysZ* exhibited similar uptake profiles in  
232 liposomes, suggesting similar functional properties (Fig. 4-S1a).

233  
234 To determine whether sulfate uptake by CysZ was driven by the concentration gradient of sulfate  
235 itself, or if it was coupled to a secondary driving force such as an ion (e.g.,  $\text{H}^+$ ,  $\text{Na}^+$ ) gradient, we  
236 tested the effect of the uncouplers CCCP (carbonyl cyanide m-chlorophenyl hydrazone), and  
237 oligomycin, as well as that of the ionophores valinomycin and gramicidin on CysZ-mediated  
238  $[\text{}^{35}\text{S}]\text{O}_4^{2-}$  accumulation in our cell-based assay (Buckler & Vaughan-Jones, 1998). Since none of  
239 these uncoupling agents had a significant effect on the accumulation of  $[\text{}^{35}\text{S}]\text{O}_4^{2-}$ , these  
240 experiments suggest that CysZ-mediated  $[\text{}^{35}\text{S}]\text{O}_4^{2-}$  flux is not dependent on the ‘classical’  $\text{H}^+$  or  
241  $\text{Na}^+$  electrochemical transmembrane gradient, thus indicating that the observed uptake solely  
242 depends on the  $\text{SO}_4^{2-}$  transmembrane concentration gradient (Fig. 4-S1b), a notion that is  
243 consistent with a channel-like mechanism for CysZ-mediated  $\text{SO}_4^{2-}$  translocation.

244  
245 Finally, we employed the use of single-channel electrophysiological current recordings on CysZ  
246 (*PdCysZ* and *IICysZ*) reconstituted in a planar lipid bilayer (Fig. 4-S2). Consistent with our  
247  $[\text{}^{35}\text{S}]\text{O}_4^{2-}$ -based flux assays, these electrophysiological measurements showed that reconstituted  
248 CysZ exhibits channel-like properties when a membrane potential is applied in symmetrical  
249  $\text{Na}_2\text{SO}_4$  solutions on both sides of the bilayer. The *IICysZ* protein exhibits an average open  
250 probability ( $P_{\text{OPEN}}$ ) of 0.8 and conductance estimated as  $92 \pm 12$  pS. However, unitary  
251 conductance levels varied, showing a dependence on the amount of protein reconstituted in the  
252 planar lipid bilayer. The *PdCysZ* protein passes a broad distribution of currents at fixed voltages.

253 For both proteins, the  $\text{SO}_4^{2-}$  currents are completely abolished by the presence of low micromolar  
254  $\text{SO}_3^{2-}$  concentrations.

255

## 256 **Sulfate Binding Site**

257 A bound  $\text{SO}_4^{2-}$  ion was observed in the structure of *IICysZ*. This binding site was confirmed by  
258 purifying and crystallizing CysZ in the presence of the heavier  $\text{SO}_4^{2-}$ -analog selenate ( $\text{SeO}_4^{2-}$ ). In  
259 the  $\text{SO}_4^{2-}$  bound structure, each protomer in the dimer showed electron density consistent with a  
260 bound sulfate, but only one of the two refined to full occupancy, hence only one is shown in the  
261 refined model of *IICysZ* (Fig. 5a). The location of the bound  $\text{SO}_4^{2-}$  is close to the putative  
262 membrane interface where it is coordinated by two arginine residues (R27 and R28 in *IICysZ*)  
263 and the backbone amides of residues G25 and L26. This  $\text{SO}_4^{2-}$ -binding site is in the loop between  
264 H1 and H2, with the motif GLR(R) being well conserved among the CysZ family. Consistent  
265 with this observation, crystals of *IICysZ* in which R27 and R28 were replaced with alanines did  
266 not show interaction with  $\text{SO}_4^{2-}$  in that site based on i) the lack of any density in the refined  
267 mutant structure at 2.3 Å and ii) functional studies (see below). We could not confirm the  
268 presence of  $\text{SO}_4^{2-}$  in either of the other structures of *PfCysZ* and *PdCysZ*, owing, at least in part,  
269 to their lower resolution limit (~3.5 Å). Soaking and co-crystallization attempts on both *PfCysZ*  
270 and *PdCysZ* with  $\text{SeO}_4^{2-}$  resulted in cracking and destabilization of crystals, and loss of  
271 measurable diffraction. In this vein, *IICysZ* R27A/R28A, and the corresponding *PfCysZ* R25A  
272 and *PdCysZ* R23A mutants all have severely impaired sulfate uptake capability, as demonstrated  
273 in cells and proteoliposomes (Fig. 5b, 4-S1a), consistent with a conserved role for these targeted  
274 arginine residues in all CysZ variants.

275

## 276 **Conserved core in the hydrophilic head**

277 Each apex of the triangular faces of the *PdCysZ* hexamer comprises an extra-membranous  
278 hydrophilic head of a CysZ protomer (Fig. 1a and 5c). The central core of this hydrophilic head  
279 consists of the ends of H3 and H5 and the start of H4, with their residues forming an intricate  
280 network of hydrogen bonds and salt bridges that hold this helical bundle together (Fig. 5c). Two  
281 highly conserved motifs in this region, ExVE and QYxDYPxDNHK (Fig. 2c), likely play critical  
282 roles in this network of interactions. The two aspartates E103 and E106 (*PdCysZ*) in the first  
283 motif interact with R129, N184 and R110, H185, respectively (Fig. 5c). The conserved R129 and  
284 R133 on H4b in turn also interact with D183 and N184 in the DNHK sequence stretch of H5b in  
285 the second motif. In the second motif, a conserved tyrosine (Y177) lies below the membrane  
286 interface towards the core of the molecule, along H5.

287  
288 Mutational studies on a subset of these conserved hydrophilic-head residues highlight their  
289 functional relevance (Fig. 5d). R129 mutants (R129E or Q) exhibited a severe loss of  $\text{SO}_4^{2-}$   
290 binding and uptake, and mutations made to Q176 and Y177 also showed loss in function, albeit  
291 to a lesser extent. Charge reversal mutations made to E103 and E106 (to K or R) or the  
292 equivalent *IICysZ* E107, E110 resulted in very poor expression and stability levels, suggesting  
293 that the disruption of the interaction network in this region may destroy the structural integrity of  
294 the protein.

295

## 296 **Putative pore and sulfate translocation pathway of CysZ**

297 It was already evident from the initial *IICysZ* structure that the hydrophilic head presented an  
298 incipient opening into the membrane, as seen in the center of the Fig. 5c inset, but it was quite

299 unclear how this opening might relate to transmembrane sulfate translocation. The ‘transverse’  
300 dimer structure of *PfCysZ* clarified the possibility for ion permeation by showing that openings  
301 in its two protomers aligned across the putative membrane; however, the prospective  
302 transduction pathway would then be open on one side to the bilayer. The *PdCysZ* structure  
303 showed that the open sides of transverse dimers line a central cavity in the *PdCysZ* hexamers.  
304 Thus, plausible transduction pathways became more evident.

305  
306 The view into a protomer surface along the direct pathway between transverse dimer apices (e.g.  
307 green to orange in Fig. 3e) displays the pattern of exceptionally high conservation associated  
308 with the entrance to a putative pore for sulfate translocation (Fig. 6a, b). This putative entrance  
309 or ‘pore’ lies in the midst of a tight network of interacting residues, which is seen detailed in the  
310 inset of Fig. 5c in the very same view as for Fig. 6a. These interactions close the incipient pore  
311 from ion conduction in this conformation. The electrostatic potential surface of *PdCysZ* (Fig. 6c)  
312 shows striking and puzzling electronegativity at the conserved pore entrance (Fig. 6d compared  
313 with Fig. 6b). Because of the conservations, similar electrostatics pertain to the two other  
314 homologs. Moreover, we observe the same helix dispositions, pore shape and charge interactions  
315 in all three structures, evident when the protomers are superimposed (Fig. 3c, top view).

316  
317 Pathway prediction algorithms (namely, PoreWalker (Pellegrini-Calace, Maiwald, & Thornton,  
318 2009)) performed on the *CysZ* protomer revealed a putative ion translocation pathway that  
319 begins at the entrance to the putative pore and ends in the large central cavity of the *CysZ*  
320 hexamer that lies within the membrane (Fig. 7a, b). In the structure of *PdCysZ*, the entrance of  
321 the putative pore appears to be closed by the network of charge-interactions by conserved

322 residues, R110, E106, N184, H185 and W235 (Fig. 6a, 7c-1). These residues interact to tightly  
323 restrict access to the putative translocation pathway and constrict the entry of ions, likely  
324 selected for size and charge (Fig. 7-S1a). After the narrow entrance, the putative pathway  
325 broadens, surrounded by a ring of conserved asparagine and glutamine residues, N33, N91, N98,  
326 Q176, and N220 (Fig. 7c-2). Mutations to N98 (N98A, N98D) led to impaired sulfate uptake  
327 (Fig. 5d). Following this polar environment, the putative pathway widens even further leading  
328 into a large, primarily hydrophobic, internal cavity encapsulated by the TM helices of the  
329 *PdCysZ* hexamer, located in the plane of the lipid bilayer (Fig. 7b, 7-S1c, d). The hydrophobic  
330 cavity is enclosed on both the top and bottom by pairs of helices H4-H5, three on each side from  
331 the six protomers, pointing in towards the three-fold axis, with each side of the cavity, at its mid-  
332 section, measuring  $\sim 50$  Å, when viewed from above or outside the membrane (Fig. 7-S1c, d).  
333 Given the symmetric, dual topology nature of the CysZ assembly, the ions could then exit the  
334 cavity via the same pathway as they entered, but traveling through CysZ protomers located on  
335 the opposite side of the membrane.

336

## 337 **DISCUSSION**

338 There are four known families of dedicated  $\text{SO}_4^{2-}$  transport systems in prokaryotes<sup>6</sup>, of which  
339 CysZs are the least studied (Zhang et al., 2014). The sequence of CysZ, coding for an integral  
340 membrane protein with four predicted TM segments, shows no resemblance to any other known  
341 protein. This, and the quest to set the basis for a mechanistic understanding of function,  
342 prompted us to investigate the structure of CysZ.

343

344 We present here three structures of CysZ from different species, all determined by x-ray

345 crystallography. These structures are all similar, showing a novel fold comprising two extended  
346 TM helices and two hemi-penetrating helical hairpins, giving rise to a tripod-like shape within  
347 the membrane, and a hydrophilic head (Fig. 2a, b, 3c). Two of the structures (*IICysZ* and  
348 *PfCysZ*) show dimers in the crystals, albeit with different interfaces (Fig. 3a, b), and the third  
349 structure (*PdCysZ*) displays a hexameric assembly in multiple crystal forms (Fig. 1a).

350

351 All three structures have a dimeric component, each of which is present in the hexameric  
352 arrangement present in all the crystal forms of *PdCysZ* (Fig. 3a, b), showing how they are all  
353 related. Furthermore, *IICysZ* can be crosslinked in membranes to the alternative *PfCysZ* dimer  
354 by engineering of disulfide cysteine mutants (Fig. 3-S2), which suggests that *IICysZ* can adopt  
355 both of the dimer assemblies observed in the *PdCysZ* hexamer. Thus, we hypothesize that *CysZ*  
356 is a hexamer in nature, as observed in *PdCysZ*, and that in the case of *IICysZ* and *PfCysZ*, this  
357 assembly may have come apart into the subsequently crystallized dimeric components during the  
358 process of detergent extraction from the membrane and purification. This could be explained by  
359 the unusually labile, and conformationally-flexible, nature of the H4b-H5a helical hairpin of  
360 *CysZ*, with only one pair of stabilizing TM helices per protomer (H2-H3). We presume that the  
361 hexamer is maintained with the support and scaffolding of the lipid bilayer.

362

363 *CysZ* shows a clear dual topology arrangement, which we confirmed with cross-linking  
364 experiments on membranes (Fig. 3-S2). Dual-topology insertion is fairly uncommon in  
365 membrane proteins; however, reported cases include the well-documented EmrE, a multi-drug  
366 resistant export protein that inserts into the membrane as an anti-parallel dimer, and the more  
367 recently discovered and studied family of double-barreled ‘Fluc’ fluoride channels (Amadi,



368 Koteiche, Mishra, & McHaourab, 2010; Korkhov & Tate, 2009; Rapp, Granseth, Seppala, & von  
369 Heijne, 2006; Stockbridge et al., 2015; Stockbridge, Robertson, Kolmakova-Partensky, & Miller,  
370 2013).

371  
372 Functional characterizations of the three CysZs for which we have obtained structural  
373 information show that all three mediate  $\text{SO}_4^{2-}$  uptake and that this uptake is inhibited by  $\text{SO}_3^{2-}$ ,  
374 for which the protein has higher affinity. Comparable results were obtained in cell-based as well  
375 as in proteoliposome-based uptake assays (Fig. 4b, d, 4-S1a). Affinities for  $\text{SO}_4^{2-}$  and  $\text{SO}_3^{2-}$  were  
376 measured by SPA (Fig. 4c). These results are consistent with previously reported data on *E. coli*  
377 CysZ (Zhang et al., 2014). Experiments performed on cells with uncoupling agents (Fig. 4-S1b)  
378 showed that CysZ-mediated  $\text{SO}_4^{2-}$  uptake was independent of a classical electrochemical  
379 gradient, thus suggestive of the driving force being a concentration gradient of  $\text{SO}_4^{2-}$  across the  
380 membrane. This hypothesis is supported by our single-channel bilayer experiments performed  
381 with *PdCysZ* and *IlCysZ*, which show that CysZ has channel-like properties (Fig. 4-S2).

382  
383 Building on our functional and structural discoveries, our results suggest a fascinating hypothesis  
384 for mechanisms of  $\text{SO}_4^{2-}$  transfer and regulation. There is a conserved central core (Fig. 6a),  
385 which is likely to have a structural role. Close to this lies a sulfate-binding site, with functional  
386 implications (Fig. 5a), and the entrance to a putative pore (Fig. 5c). The entrance of this putative  
387 pore is delineated by a hydrophilic network of conserved residues that form a tight constriction  
388 in our observed conformation. Following this hypothetical route, sulfate ions that might enter  
389 through the three separate pores, one per CysZ dimer pair, would converge into a central  
390 hydrophobic cavity (Fig. 7b, 7-S1c, d). Once sulfate ions enter this central cavity, due to the

391 unfavorable environment, these are likely to exit it rather rapidly through one of the three  
392 available exit pores on the cytoplasmic side of the hexamer. Hydrophobic cavities and pores are  
393 seen commonly in ion channels, with examples ranging from the well documented hydrophobic  
394 inner pores of the various potassium channels (Doyle et al., 1998) to the SLAC1 (Chen et al.,  
395 2010) and bestrophin anion channels (Yang et al., 2014), and the MscS and MscL  
396 mechanosensitive channels (Anishkin, Akitake, Kamaraju, Chiang, & Sukharev, 2010; Bass,  
397 Strop, Barclay, & Rees, 2002; Birkner, Poolman, & Kocer, 2012; Chen et al., 2010; Doyle et al.,  
398 1998), facilitating the rapid passage of ions due to the unfavorable environment, as well as  
399 potentially providing a means of ‘hydrophobic gating’ (Aryal, Sansom, & Tucker, 2015).

400

401 The surface electrostatics of CysZ (Fig. 1b and Fig. 6c, d) draw attention to the negative  
402 potential of the conserved core of each protomer, which is then surrounded by a more neutral  
403 annulus. While this feature seems contradictory to admission of  $\text{SO}_4^{2-}$  ions at the extracellular  
404 side, it could be advantageous for expulsion into the cytoplasm on the opposite side. In any case,  
405 the structures that we have determined are evidently in a closed state, implying that a  
406 conformational change would have to occur to allow passage of  $\text{SO}_4^{2-}$ , likely modifying the  
407 surface electrostatics of the protein. It is tempting to speculate that the regulation of the opening  
408 of the pore could be modulated by the binding of sulfate ions to the identified sulfate-binding  
409 site, as it is near the entrance of the putative pore. L22 lies in proximity of the entrance of the  
410 putative pore, and its backbone amide (along with G21) coordinates the sulfate ion in the GLR  
411 motif of the sulfate-binding site. Thus, the binding of sulfate to the GLR motif could trigger a  
412 conformational change needed to displace L22, allowing for a wider opening for the sulfate ions

413 to enter the pore. Sulfite could hypothetically exert its inhibitory effect on CysZ function by  
414 binding to this site.

415

416 There is an overall electropositive region in the center of the hexameric molecule, when viewed  
417 from the top (Fig. 1b, 6c, d). This central region is lined by conserved residues along helices  
418 H4b-H5a, namely, R129, R133 and K137. The hydrophobic tips of helices H4b-H5a of the three  
419 protomers on each side of the membrane then converge in the center of the hexamer. A pore  
420 through the three-fold axis of the hexamer could provide an alternative passageway for  $\text{SO}_4^{2-}$   
421 ions through this assembly. Although we cannot exclude it, this possibility seems less plausible  
422 because of the poor conservation at the tips of helices H4b-H5a and the strictly hydrophobic  
423 nature of this region.

424

425 We observe, in agreement with previous data, that  $\text{SO}_3^{2-}$  inhibits CysZ-mediated  $\text{SO}_4^{2-}$  flux (Fig.  
426 4b, d, 4-S2a, f) (Zhang et al., 2014). The dual topology nature of CysZ could provide a means for  
427 internal as well as external regulation. However, experiments in solutions – such as  
428 crystallizations – where all molecules are exposed to the same chemical environment, makes  
429 capturing such a state in an open or  $\text{SO}_3^{2-}$  blocked conformation challenging. Despite this  
430 limitation, our CysZ structures and associated functional experiments have allowed us to make  
431 substantial progress in the understanding  $\text{SO}_4^{2-}$  uptake by these membrane permeases. This work  
432 sets the framework for future experiments aimed at unraveling the molecular details of how  
433  $\text{SO}_4^{2-}$  is translocated across the membrane by CysZ and how this process is regulated.

434

435 **PDB Accession codes:** *Idiomarina loiheinsis* CysZ: **3TX3**, *Pseudomonas fragi* CysZ: **TBD**,  
436 *Pseudomonas denitrificans* CysZ: **TBD**.

437

## 438 **Materials and Methods**

439

### 440 **Ortholog selection and cloning**

441 A total of 63 *cysZ* candidate genes were selected by a bioinformatics approach implemented by  
442 the New York Consortium of Membrane Protein Structure (NYCOMPS), as previously described  
443 (Punta et al., 2009). The majority of the genes (including *IICysZ*, uniprot ID: Q5QUJ8) were  
444 PCR-amplified from fully sequenced prokaryotic genomic DNA (obtained from ATCC<sup>®</sup>) (Love  
445 et al., 2010). CysZ genes from certain species, such as *PfCysZ* (uniprot ID: A0A0X8F058) and  
446 *PdCysZ* (uniprot ID: M4XKU7) were chemically synthesized by GenScript<sup>®</sup>, with codon-  
447 optimization for protein expression. All genes were cloned by ligation-independent cloning  
448 (LIC) (Aslanidis & de Jong, 1990) into an IPTG (isopropyl  $\beta$ -D-1-thiogalactopyranoside)  
449 inducible, kanamycin-resistant pET derived plasmid (Novagen), with an N-terminal deca-  
450 histidine tag (His10) and a TEV (tobacco etch virus) protease site to allow for tag cleavage upon  
451 purification.

452

### 453 **Protein expression and purification**

454 Expression plasmids bearing the *cysZ* genes were transformed into BL21(DE3)pLysS cells using  
455 standard protocols, and grown at 37 °C in 2XYT media supplemented with 50  $\mu$ g/ml kanamycin  
456 and 50  $\mu$ g/ml chloramphenicol in an orbital shaker at 250 rpm. Protein expression was induced  
457 for ~16 hours at 22 °C with 0.2 mM IPTG once an absorbance ( $A_{600\text{ nm}}$ ) of 0.8-1.0 was reached.

458 Selenomethione (Se-Met)-incorporated proteins were expressed in BL21(DE3)pLysS cells  
459 grown using an M9 minimal media kit (Shanghai Medicilon Inc.) supplemented with the  
460 necessary minerals, vitamins and non-inhibitory amino acids. Se-Met was added prior to IPTG  
461 induction at an  $A_{600\text{ nm}}$  of 1.2. The Se-Met-incorporated protein was purified using the same  
462 procedures as the native protein. Once harvested, the cells were resuspended at 0.2 g/ml in lysis  
463 buffer containing 20 mM Na-Hepes pH 7.5, 200 mM NaCl, 20 mM MgSO<sub>4</sub>, DNase I and RNase  
464 A, 0.5 mM PMSF (phenylmethylsulfonyl fluoride), EDTA-free Complete protease inhibitor  
465 cocktail (Roche) and 1 mM TCEP-HCl (Tris (2-carboxyethyl) phosphine hydrochloride) as a  
466 reducing agent. Initial small-scale expression and detergent screening was performed on 80 mg  
467 of pelleted cells (wet weight), and 7-10 g of cells for large-scale protein purification. Cells were  
468 lysed using an Avestin<sup>®</sup> EmuSiFlex-C3 homogenizer, followed by protein solubilization with 1%  
469 (w/v) decyl maltopyranoside (DM) (Anatrace<sup>®</sup> Affymetrix) for 1 hour at 4 °C, after-which  
470 insoluble material was removed by ultra-centrifugation at 100,000 x g. The solubilized protein  
471 was applied to Ni-NTA Sepharose (Qiagen) in batch, washed with lysis buffer containing 0.2%  
472 DM and 40 mM imidazole and eluted in buffer containing 250 mM imidazole. Upon elution,  
473 CysZ was dialyzed overnight with His-tagged TEV protease at 4°C, against a buffer containing  
474 20 mM Na-Hepes pH 7.0, 200 mM NaCl, 0.2% DM, 1 mM TCEP-HCl and 20 mM Na<sub>2</sub>SO<sub>4</sub>,  
475 allowing for the cleavage of the His<sub>10</sub> tag and removal of the imidazole. Tagless CysZ was then  
476 re-passaged over Ni-NTA sepharose to re-bind of any uncleaved CysZ, TEV protease and the  
477 cleaved His<sub>10</sub> tag. The protein was then subjected to size-exclusion chromatography (Superdex  
478 200 10/30 HR, GE Healthcare) in 20 mM Na-Hepes pH 7.0, 200 mM NaCl, 1 mM TCEP-HCl,  
479 20 mM Na<sub>2</sub>SO<sub>4</sub> and appropriate detergent for crystallization, for *IICysZ*: 0.06% Lauryl  
480 dimethylamine oxide (LDAO) and for *PfCysZ* and *PdCysZ*: 1% β-octyl glucopyranoside (β-

481 OG). The choice of detergent was made based on protein yield, stability and mono-disperse gel-  
482 filtration peaks obtained in the initial small-scale detergent screening. A yield of ~1.5 mg of  
483 purified CysZ was typically obtained from a cell pellet of 7-8 grams (1 liter of culture).

484

#### 485 **Protein Crystallization**

486 *IICysZ*: Crystals of *IICysZ* in LDAO were obtained by vapor diffusion at a protein concentration  
487 of 6-8 mg/ml at 4°C, in a 1:1 v/v ratio against a precipitant of 28-32% PEG400, 0.1M Tris-HCl  
488 pH 8.0, with salt additive of 0.1 M NaCl or 0.1 M MgCl<sub>2</sub>. The crystals appeared overnight,  
489 continued to grow in size over the course of 2-4 days after set-up. After optimization, the crystals  
490 grew to a maximum size of ~200 μm x 100 μm x 50 μm with a rhomboid or cuboid shape. The  
491 crystals were harvested directly without the addition of a cryo-protectant and flash-frozen into  
492 liquid nitrogen, for data collection on the X4A/X4C beamlines at National Synchrotron Light  
493 Source (NSLS), Brookhaven National Labs (Upton, NY). SeMet derivatized and selenate co-  
494 crystals were obtained from the same conditions as the native crystals.

495 *PfCysZ*: Crystals of *PfCysZ* in β-OG at 5 mg/ml were initially obtained at 4 °C by vapor  
496 diffusion, in a 1:1 protein to precipitant ratio, after 1-2 days against 28% PEG400, 0.1 M MES  
497 pH 6.0. They were cuboid in shape and grew in clusters of multiple crystals originating from a  
498 common locus. The crystals were optimized to a maximal size of ~150-200 μm x 50 μm x 50  
499 μm, with the best diffracting crystals grown under silicone oil (visc. 500) in microbatch Terazaki  
500 plates. Crystals were directly flash-frozen into liquid nitrogen without the use of a cryo-  
501 protectant and were exposed to X-rays at the NE-CAT (241DC and E) beamlines at APS,  
502 Argonne National Lab (Argonne, IL) for data collection. SeMet crystals were obtained from the  
503 same conditions as the native protein.

504 *PdCysZ*: Crystals of *PdCysZ* in  $\beta$ -OG at 5-8 mg/ml were initially obtained at 4°C by vapor  
505 diffusion, in a 1:1 protein to precipitant ratio, after 2-3 days against 22-30% PEG550MME, 0.1  
506 M Na-Hepes pH 7.0. The rod-like crystals were hexagonal on one face, and grew in clusters  
507 originating from a common locus as well as on the edge of the drop. The multiple crystal forms  
508 observed were all obtained in the same crystallization conditions. The crystals were optimized to  
509 a maximal size of  $\sim$ 200-250  $\mu$ m x 25  $\mu$ m x 50  $\mu$ m. With the addition of 20% glycerol (w/v) as a  
510 cryo-protectant, the crystals were flash-frozen into liquid nitrogen and were exposed to X-rays at  
511 the NE-CAT (24-IDC and 24-IDE) beamlines at APS, Argonne National Lab (Argonne, IL) for  
512 data collection.

### 513 **Data collection and structure determination**

514 *IICysZ*: The structure of *CysZ* was determined by the single-wavelength anomalous diffraction  
515 (SAD) method from anomalous diffraction of a selenate ( $\text{SeO}_4^{2-}$ ) derivative crystal. The  
516 anomalous signals were measured at the Se K-edge peak wavelength, which was determined  
517 experimentally from fluorescence scanning of the crystal prior to data collection. All diffraction  
518 data were recorded at 100K using an ADSC Q4R CCD detector at the NSLS X4 beamline.  
519 Diffraction data were indexed, integrated, scaled, and merged by HKL2000 (Otwinowski &  
520 Minor, 1997). Selenate substructure determination was performed with the SHELXD program  
521 through HKL2MAP (Pape & Schneider, 2004). A resolution cut-off at 2.6 Å was used for  
522 finding Se sites by SHELXD. A strong peak found by SHELXD was used to calculate initial  
523 SAD phases, which were improved by density modification by SHELXE (Sheldrick, 2010). With  
524 a solvent content of 65% corresponding to 2 molecules in the asymmetric unit, 50 cycles of  
525 density modification resulted in an electron density map of sufficient quality for model building.  
526 The initial polypeptide chain was built by Arp/Warp (Langer, Cohen, Lamzin, & Perrakis, 2008),

527 at 2.1 Å by using experimental phases. Further cycles of model building were performed  
528 manually using COOT (Emsley, Lohkamp, Scott, & Cowtan, 2010) and all rounds of  
529 refinements were performed with PHENIX (Adams et al., 2010). The native structure of CysZ  
530 with bound sulfate was determined both by multi-crystal native SAD (Liu et al., 2012) (final  
531 resolution of 2.3 Å) and by molecular replacement with the selenate bound model (final  
532 resolution of 2.1 Å). In addition, phase information obtained from Se-Met derivatized protein  
533 with 9 Se sites per CysZ molecule, verified our model obtained from the selenate data.

534  
535 *PfCysZ*: Multi-crystal SeMet-SAD data sets were collected at APS beamline 24-IDC with a  
536 Pilatus 6M pixel array detector under a cryogenic temperature of 100 K. To enhance anomalous  
537 signals from Se atoms for phasing (Liu, Zhang, & Hendrickson, 2011), the X-ray wavelength  
538 was tuned to the Se-K edge ( $\lambda=0.9789$  Å). The orientation of crystals was random without  
539 special consideration of crystal alignment, and beam size was adjusted to match the crystal size.  
540 A total of 22 data sets were collected, each from a single crystal. An oscillation angle of 1° was  
541 used for data collection with a total of 360 frames for each data set. The beam size was adjusted  
542 to match the crystal size. The 22 single-crystal data sets were processed individually by using  
543 XDS (Kabsch, 2010) and CCP4 packages (Winn et al., 2011). For phasing purposes, the low-  
544 resolution anomalous signals were enhanced by increased multiplicity. By rejection of 7 outlier  
545 crystals (Liu et al., 2012), anomalous diffraction data from 15 statistically-compatible crystals  
546 were scaled and merged for phasing. For outlier rejection, a unit-cell variation of  $1.0\sigma$  was used.  
547 CCP4 program POINTLESS and SCALA (Evans, 2006) were used for data combining; and  
548 Bijvoet pairs were kept separately throughout the data flow. For refinement purposes, keeping  
549 the high angle data was important, and done by limiting radiation damage as well as by



550 increasing multiplicity. Although most *PfCysZ* crystals diffracted to only about 3.5 Å spacings  
551 or poorer, we intentionally set the detector distance to include higher spacings. Higher resolution  
552 data were retained through a data merging procedure that is described as follows: 1) The 22  
553 individually processed data sets were analyzed by diffraction dissimilarity analysis by using only  
554 high angle data between 3.5-3.0 Å, resulting in three subsets. 2) The data statistics of members in  
555 each subset were checked manually and the subset that contained the highest angle data set, e.g.  
556 data set 6, was selected for further analyses and data combination. 3) Each data set within the  
557 selected subset was compared with data set 6 by high-angle intensity correlation. Six of the  
558 highest resolution data sets were statistically comparable and therefore were selected for  
559 merging. For phasing, substructure solutions were found by SHELXD (Sheldrick, 2010) and  
560 were further refined and completed by PHASER (McCoy et al., 2007) and then used to compute  
561 initial SAD phases at the data limit by SAD phasing with PHENIX (Adams et al., 2010). Phases  
562 were density modified with solvent flattening and histogram matching as implemented in CCP4  
563 program DM (Cowtan & Zhang, 1999) to improve phases and also to break phase ambiguity.  
564 The estimated solvent contents of 71% were used for density modification. The model was  
565 initially built into the experimental electron density map by COOT (Emsley et al., 2010),  
566 followed by iterative refinement by PHENIX and model building in COOT. The refined model  
567 does not contain solvent molecules at this resolution.

568

#### 569 *PdCysZ*:

570 Native crystal data were collected at the APS beamline 24-IDC with a Pilatus 6M pixel array  
571 detector at a cryogenic temperature of 100 K at an X-ray wavelength of  $\lambda=1.023$  Å. The sample-  
572 to-detector distance was set to 500 mm. An oscillation angle of 0.5° was used for data collection.

573 The beam size was adjusted to match the crystal size. Molecular replacement was attempted  
574 using a variety of search models (*PfCysZ* and *IICysZ* monomer/dimer models, with various  
575 degrees of truncation). Success was achieved by searching for six copies of a search model  
576 consisting of the *PfCysZ* monomer, with residues 36-53 deleted and the sequence adjusted using  
577 CHAINSAW (Stein, 2008) (pruning non-conserved residues to the gamma carbon). Density  
578 modification of the initial map was performed in PARROT, incorporating solvent flattening,  
579 histogram matching and NCS-averaging. An initial round of model building was performed in  
580 COOT (Emsley et al., 2010) into this map, followed by further phase improvement and bias-  
581 removal using *phenix.prime\_and\_switch* (Adams et al., 2010). The improved map was used for a  
582 second round of model building, followed by iterative cycles of reciprocal space refinement  
583 using *phenix.refine*, and real-space refinement and correction in COOT.

584 All graphical representations and figures of our structural models were made in either PyMOL  
585 (Schrodinger, 2010) or Chimera (Pettersen et al., 2004).

586

### 587 **Radioligand Binding by Scintillation Proximity Assay (SPA)**

588 *CysZ* was purified by standard protocols as described above, with the exception of leaving the  
589 histidine-tag intact without cleavage by the TEV protease. The imidazole was removed by  
590 dialysis and the purified protein was not run over the size exclusion column, and instead was  
591 directly concentrated to 2 mg/ml for the SPA experiment. [<sup>35</sup>S]O<sub>4</sub><sup>2-</sup> obtained in the form of  
592 sulfuric acid (American Radiolabeled Chemicals (ARC)) was used as the radioligand. 100 ng –  
593 250 ng of *CysZ* was used per assay point, diluted in 100 µl of assay buffer containing 20 mM  
594 HEPES pH 7.0, 200 mM NaCl, 0.2% DeM, 20% glycerol, 0.5 mM TCEP, with 12.5 µl of Copper  
595 YSi beads (Perkin Elmer). A trace amount of [<sup>35</sup>S]O<sub>4</sub><sup>2-</sup> (~10-30 nM) mixed with cold ligand

596 (Na<sub>2</sub>SO<sub>4</sub>) was added to each well of a 96 well clear bottom plate along with the mix of protein,  
597 buffer and beads. The plate was agitated for a minimum of 30 minutes to as long as overnight,  
598 and measured in a scintillation counter the following morning (MicroBeta, Perkin Elmer).  
599 Competitive binding experiments with a gradient of a competing cold ligand ranging from (10  
600 nM – 100 mM) were performed in triplicate, with the control measured at each concentration by  
601 adding 1 M Imidazole to the reaction buffer, to prevent binding of the protein to the scintillation  
602 beads. All data were analyzed and graphically represented with GraphPad™ Prism6 software.

603

#### 604 [<sup>35</sup>S]O<sub>4</sub><sup>2-</sup> Uptake Experiments

605 *In whole cells:* The *cysZ* gene knockout strain in *E. coli* K-12 was obtained from the Coli  
606 Genetic Stock Center at Yale University (<http://cgsc.biology.yale.edu/>), originally found in the  
607 Keio knockout collection (Baba et al., 2006). Genotype: F-, Δ(araD-araB)567, Δ  
608 lacZ4787(::rrnB-3), λ -, ΔcysZ742::kan,rph-1, Δ(rhaD- rhaB)568, hsdR514. The knockout  
609 strain was made competent by standard protocols (Hanahan, 1983) to allow for the  
610 transformation and expression of *cysZ*-containing plasmids, for rescue experiments. Wild-type  
611 parental *E. coli* K-12 was used as a control strain. The strains were grown in LB (Luria Broth)  
612 without any antibiotic (for the WT cells) and with 50 μg/ml of kanamycin for the knockout cells  
613 at 37 °C overnight to saturation. The culture was spun down at 3000 x g the next morning and  
614 the cells were resuspended in Davis-Mingioli (DM) minimal media without sulfate (MgSO<sub>4</sub> was  
615 replaced with MgCl<sub>2</sub> and (NH<sub>4</sub>)<sub>2</sub>SO<sub>4</sub> was replaced by NH<sub>4</sub>Cl), supplemented with 0.63 mM L-  
616 cysteine to allow the cells to grow in the absence of sulfate (Davis & Mingioli, 1950). The cells  
617 were incubated in DM media for a minimum of 9 hours, maximum overnight, at 37°C after  
618 which they were spun down and washed 3 times in 5 mM Na-Hepes pH 7.0. This ensured that

619 the cells were starved of  $\text{SO}_4$ , to deplete the sulfate stores in the cell, enhancing sulfate uptake  
620 measured (F. Parra, personal communication). The cells were resuspended in the same buffer at  
621 0.7 g/ml at room temperature, and 10  $\mu\text{l}$  of the cell suspension was used for each point in the  
622 uptake experiment. A final concentration of 320  $\mu\text{M}$  of  $\text{SO}_4$  ( $\text{Na}_2\text{SO}_4$  with  $[\text{}^{35}\text{S}]\text{O}_4^{2-}$  as a tracer)  
623 was used outside. The uptake experiments were performed in triplicate, measured over a time  
624 course of typically 0 - 300 seconds. The reaction was stopped by dilution, by adding 1.5 ml of  
625 ice-cold buffer (5 mM Na-Hepes pH 7.0) to the cells in the tube. The reaction mix was  
626 immediately poured onto a vacuum filtration device, with an individual glass-fiber filter (0.75  
627  $\mu\text{m}$ , GF/F) per assay point, after which the filters are washed once more with 1.5 ml of buffer.  
628 The dry filters, with the cells attached to their surface, were then moved to scintillation vials,  
629 containing 4 ml of EconoSafe® scintillation cocktail, to be counted the next morning. For the  
630 *CysZ* cell rescue experiments, a similar protocol was used, transformed with an ampicillin  
631 resistant expression vector containing the *CysZ* gene, mutant or empty vector (as the control).  
632 Upon transformation, the cells were grown overnight in a 4 ml starter culture of LB with 50  
633  $\mu\text{g/ml}$  kanamycin and 100  $\mu\text{g/ml}$  ampicillin. The next morning the entire 4 ml was used to  
634 inoculate 75 ml of LB (Kan, Amp), and grown at 37 °C for 2.5-3 hours until an  $\text{OD}_{600}$  of 0.6-0.8  
635 was reached. Protein expression was then induced at 37 °C for 4 hrs with 0.2 mM IPTG. After  
636 4hrs, the cells were spun down and resuspended in the DM minimal media without sulfate, 0.63  
637 mM cysteine, Amp, Kan and 0.2 mM IPTG, and incubated overnight at 22 °C. The next morning  
638 the cells were spun down, washed 3 times with 5 mM Na-Hepes 7.0 and resuspended at final  
639 concentration of 0.7 g/ml for uptake.

640 *In proteoliposomes:* *CysZ* was purified by the procedure described above, and upon elution from  
641 the size-exclusion column concentrated to 1 mg/ml for reconstitution into liposomes at a protein

642 to lipid ratio of 1:100. The liposomes were comprised of a 3:1 ratio of *E. coli* polar lipids and  
643 phosphatidylcholine (PC) (Avanti Polar Lipids), prepared by previously described methods  
644 (Rigaud, Pitard, & Levy, 1995). Typically, 10  $\mu$ l of CysZ-proteoliposomes and control ‘empty’  
645 liposomes at a concentration of 5-10 mg/ml, were used per assay point and diluted into a reaction  
646 buffer of 100  $\mu$ l, containing [ $^{35}$ S]O $_4^{2-}$  (at trace amounts of  $\sim$ 10-15 nM) supplemented with  
647 Na $_2$ SO $_4$  at the desired concentration. The experiment was performed in triplicate and sulfate  
648 accumulation was measured either over a time-course or at a fixed time with different amounts  
649 of SO $_4^{2-}$  or SO $_3^{2-}$  present. The reaction was stopped by dilution, by adding 1.5 ml of ice-cold  
650 buffer (5 mM Na-Hepes pH 7.0) to the cells in the tube. The reaction mix was immediately  
651 poured onto a vacuum filtration device, with an individual nitrocellulose filter (0.22  $\mu$ m) per  
652 assay point, after which the filters are washed once more with 1.5 ml of buffer. The dry filters,  
653 with the cells attached to their surface, were then moved to scintillation vials, containing 4 ml of  
654 EconoSafe $^{\text{®}}$  scintillation cocktail, to be counted the next morning.

#### 655 **Measurement of CysZ single-channel activity in the planar lipid bilayer**

656 A previously described method (Mueller, Rudin, Tien, & Wescott, 1962) to insert ion channels  
657 incorporated in liposomes into “painted” planar lipid bilayers by vesicle fusion was used to  
658 incorporate CysZ into a lipid bilayer created on a small aperture between two aqueous  
659 compartments, called the cis and trans compartments (Morera, Vargas, Gonzalez, Rosenmann, &  
660 Latorre, 2007). Since this system is very sensitive to contaminants, CysZ was expressed in and  
661 purified from a porin- deficient strain of *E. coli* cells to prevent any carry through of  
662 contaminating porins that could create large conductances and artifacts in the single-channel  
663 recordings. Phosphatidylethanolamine (PE) and phosphatidylserine (PS) (Avanti Polar Lipids),  
664 in a ratio of 1:1 were dissolved in chloroform to mix, and dried completely under an argon

665 stream. The mixed and dried lipids were then dissolved in n-decane to a final concentration of 50  
666  $\mu\text{g/ml}$ , and kept at 4 °C. The lipids are always prepared fresh, on the same day of the experiment.  
667 The purified CysZ protein were incorporated into PE:PS (1:1) liposomes by brief sonication at  
668 80kHz for 1 minute at 4 °C. The experimental apparatus consisted of two 1-ml buffer chambers  
669 separated by a Teflon film that contains a single 20- to 50- $\mu\text{m}$  hole. A lipid bilayer was formed  
670 by “painting” the hole with the 1:1 mixture of PE:PS, this results in a seal between the two cups  
671 formed by the lipids (Leal-Pinto, London, Knorr, & Abramson, 1995). For these studies, the cis  
672 side was defined as the chamber connected to the voltage-holding electrode and all voltages are  
673 referenced to the trans (ground) chamber. Stability of the bilayer was determined by clamping  
674 voltage at various levels. If a resistance  $> 100 \Omega$  and noise  $< 0.2 \text{ pA}$  were maintained in the  
675 patch, the proteoliposomes containing CysZ were added to the trans side of the chamber and  
676 stirred for 1 min. The fusion event or insertion of a channel into the bilayer was assessed by the  
677 presence of clear transitions from 0 current to an open state.

678

### 679 **Site-specific cysteine labeling experiments**

680 All functional and cysteine mutants of CysZ were generated by site-directed mutagenesis, using  
681 the QuikChange® site-directed mutagenesis kit (Stratagene). The sequence-verified mutants  
682 were then tested for expression in comparison to the WT CysZ. To address the membrane  
683 topology of *IICysZ*, single cysteine mutants were designed to perform site-directed fluorescence  
684 labeling based on the accessibility of the cysteine to the membrane impermeable thiol-directed  
685 fluorescent probe (Ye, Jia, Jung, & Maloney, 2001). A set of surface-exposed residues at  
686 different positions on the CysZ molecule were selected to be mutated to cysteines, based on the  
687 *IICysZ* structure. The cysteine mutants were expressed by standard protocols that were used for

688 the WT protein. The membrane fraction of each mutant was pelleted after cell lysis by  
689 ultracentrifugation at 100,000 x g and resuspended at 20 mg/ml (Bradford assay) in fresh buffer  
690 containing 20 mM Na-Hepes pH 7.0, 200 mM NaCl, protease inhibitors: 0.5 mM PMSF and  
691 Complete protease inhibitor cocktail EDTA-free and 1 mM TCEP-HCl. 1 ml of membranes were  
692 then incubated with 30  $\mu$ M membrane-impermeant fluorescein-5-maleimide dye (Invitrogen, 2  
693 mM stock freshly prepared in water, protected from light) for 30 minutes in the dark at room  
694 temperature. The labeling reaction was stopped by the addition of 6 mM  $\beta$ - mercaptoethanol, and  
695 the membranes were spun down and resuspended in fresh buffer to remove any remaining  
696 unreacted fluorescent dye. The fluorescently labeled protein was then purified from the  
697 membranes by solubilization with 1% DM, using a standard Ni-NTA purification protocol,  
698 qualitatively analyzed on an SDS-PAGE, and quantitatively measured by a Tecan® fluorescence  
699 plate reader at an excitation of 495 nm, emission of 535 nm.

700

### 701 **Crosslinking of Cysteine Mutant Pairs in CysZ**

702 Cysteine mutants of *PfCysZ* and *IICysZ* were designed based on pairs of residues that were in  
703 close proximity (within 3-7 Å) of each other in our structure that could have the ability to  
704 covalently join the 2 protomers of the dimer. The single and double cysteine mutants were made  
705 by site-directed mutagenesis using the QuikChange® Site-Directed Mutagenesis Kit  
706 (Stratagene). Mutants and WT were expressed using the standard protocols CysZ expression.  
707 Isolated membrane fraction was resuspended by homogenization in fresh lysis buffer at a  
708 membrane protein concentration of ~25 mg/ml (measured by Bradford Assay). Bis-  
709 methanethiosulfonate (Bis-MTS) crosslinkers (Santa Cruz Biotechnolgies) of different spacer  
710 lengths were used at 0.5mM (dissolved in DMSO) added to 1ml of resuspended membranes at

711 RT for 1 hour. Bis-MTS crosslinkers are membrane permeable, highly reactive and specific to  
712 sulfhydryl groups, and the covalent linkage is resistant to reducing agents like  $\beta$ -mercaptoethanol  
713 (Akabas, Stauffer, Xu, & Karlin, 1992). The crosslinking lengths used were: 1,1-Methanediyl  
714 Bismethanethiosulfonate (3.6 Å), 1,2- Ethanediyl Bismethanethiosulfonate (5.2 Å), 1,4-  
715 Butanediyl Bismethanethiosulfonate (7.8 Å) and 1,6-Hexanediyl Bismethanethiosulfonate (10.4  
716 Å). The reaction was quenched by the addition of 10 mM free cysteine, and the protein was then  
717 extracted and purified from the membranes with 1% DM followed by Ni-NTA resin. The  
718 imidazole is then diluted out in the Ni-elute, and the His-tag is cut with TEV protease in small  
719 scale. The cleaved protein is passaged over Ni-NTA resin to remove contaminants and uncleaved  
720 protein, and flowthrough is run on a reducing SDS- PAGE and stained with Coomassie blue to  
721 analyze dimer formation. The mutants designed were L161C (single mutant), L161C-A164C and  
722 N160C-L168C (double mutants) for *PfCysZ*; and L156C-Q163C and V157C-Q163C (double  
723 mutants) for *IICysZ*.

724

#### 725 **Acknowledgments:**

726 Crystallographic data for this study were collected on the NSLS beamline X4A at Brookhaven  
727 National Laboratory and on the NE-CAT beamlines 24ID-C and E (supported by NIH-NIGMS  
728 grant P41 GM103403) at the Advanced Photon Source. The Pilatus 6M detector on 24-ID-C  
729 beam line is funded by a NIH-ORIP HEI grant (S10 RR029205). This work was supported by  
730 NIH-NIGMS grants R01 GM098617 (F.M.) and R01 GM107462 (W.A.H.), and by grants  
731 through the New York Structural Biology Center for the New York Consortium on Membrane  
732 Protein Structure (NYCOMPS; U54 GM095315) and for the Center on Membrane Protein  
733 Production and Analysis (COMPPA; P41 GM116799). O.B.C. was supported by a Charles H.



734 Revson Senior Fellowship. We thank John Schwanof for assistance during data collection at  
735 NSLS, Joe Mindell, Francisco Parra, Albano Meli, Giuliano Sciara and Carlos A Villalba Galea  
736 for helpful advice and contributions at the early stages of the project, and Leora Hamberger for  
737 her assistance managing the Mancia Lab.

738

739 **Declaration of Competing Interests:**

740 The authors declare that they have no financial or non-financial competing interests.

741 **Figures and Tables:**

742 **Table 1: Crystallographic data and refinement statistics.**

743

| <b>Data collection</b>                     | <b>Native <i>IICysZ</i></b> | <b><i>IICysZ</i><br/>w/<i>SeO<sub>4</sub><sup>2-</sup></i><br/>(SAD)</b> | <b>SeMet <i>PfCysZ</i><br/>(6 crystals,<br/>refinement)</b> | <b>SeMet<br/><i>PfCysZ</i><br/>(15 crystals,<br/>SAD)</b> | <b>Native<br/><i>PdCysZ</i><br/>(MR-SAD)</b> |
|--------------------------------------------|-----------------------------|--------------------------------------------------------------------------|-------------------------------------------------------------|-----------------------------------------------------------|----------------------------------------------|
| <b>Beamline</b>                            | NSLS X4A                    | NSLS X4A/C                                                               | APS 24-ID-E                                                 | APS 24-ID-C                                               | APS 24-ID-C                                  |
| <b>Space group</b>                         | C2                          | C2                                                                       | C2                                                          | C2                                                        | P6 <sub>3</sub>                              |
| <b>Cell dimensions:</b>                    |                             |                                                                          |                                                             |                                                           |                                              |
| <b>a, b, c (Å)</b>                         | 128.9, 82.0,<br>100.4       | 128.9, 81.9, 100.3                                                       | 172.29, 56.9, 96.17                                         | 172.35, 56.9, 96.31                                       | 225.13, 225.13,<br>96.62                     |
| <b>α, β, γ (°)</b>                         | 90, 125.1, 90               | 90, 125.1, 90                                                            | 90, 91.43, 90                                               | 90, 91.33, 90                                             | 90, 90, 120                                  |
| <b>Z<sub>a</sub></b>                       | 2                           | 2                                                                        | 2                                                           | 2                                                         | 6                                            |
| <b>Wavelength</b>                          | 1.7432                      | 0.96789                                                                  | 0.97890                                                     | 0.97890                                                   | 1.0230                                       |
| <b>Bragg spacings (Å)</b>                  | 30-2.30                     | 50-2.10                                                                  | 40-3.20                                                     | 40-3.50                                                   | 86-3.40                                      |
| <b>R<sub>merge</sub></b>                   | 0.047 (0.257)               | 0.046 (0.417)                                                            | 0.136 (6.506)                                               | 0.135 (2.13)                                              | 0.095 (2.89)                                 |
| <b>I / σ<sub>I</sub></b>                   | 29.4 (7.9)                  | 25.0 (1.9)                                                               | 12.3 (0.7)                                                  | 24.2 (2.6)                                                | 22.4 (1.2)                                   |
| <b>Completeness (%)</b>                    | 99.9 (99.9)                 | 99.9 (100.0)                                                             | 99.8 (99.3)                                                 | 99.9 (100.0)                                              | 100.0 (100.0)                                |
| <b>Multiplicity</b>                        | 7.3 (7.2)                   | 7.6 (7.6)                                                                | 27.2                                                        | 72.8                                                      | 19.7                                         |
| <b>Refinement:</b>                         |                             |                                                                          |                                                             |                                                           |                                              |
| <b>Resolution (Å)</b>                      | 2.30                        |                                                                          | 3.50                                                        |                                                           | 3.40                                         |
| <b>No. of reflections</b>                  | 38075                       |                                                                          | 20741                                                       |                                                           | 37221                                        |
| <b>R<sub>work</sub> / R<sub>free</sub></b> | 0.200/0.238                 |                                                                          | 0.297/0.339                                                 |                                                           | 0.239/0.277                                  |
| <b>No. of atoms:</b>                       |                             |                                                                          |                                                             |                                                           |                                              |
| <b>Protein</b>                             | 3679                        |                                                                          | 3428                                                        |                                                           | 11415                                        |
| <b>Ligand/ion</b>                          | 249                         |                                                                          | 0                                                           |                                                           | 560                                          |
| <b>Water</b>                               | 162                         |                                                                          | 0                                                           |                                                           | 0                                            |
| <b>Average B-factors (Å<sup>2</sup>)</b>   | 49.4                        |                                                                          | 198.9                                                       |                                                           | 204.18                                       |
| <b>Protein</b>                             | 48.4                        |                                                                          | 198.9                                                       |                                                           | 204.18                                       |
| <b>Ligand/Ion</b>                          | 77.3                        |                                                                          | -                                                           |                                                           | -                                            |
| <b>Water</b>                               | 45.3                        |                                                                          | -                                                           |                                                           | -                                            |
| <b>Bond Ideality (r.m.s.d.):</b>           |                             |                                                                          |                                                             |                                                           |                                              |
| <b>Bond lengths (Å)</b>                    | 0.006                       |                                                                          | 0.006                                                       |                                                           | 0.004                                        |
| <b>Bond angles (°)</b>                     | 0.894                       |                                                                          | 1.133                                                       |                                                           | 0.96                                         |
| <b>Ramachandran<br/>Analysis:</b>          |                             |                                                                          |                                                             |                                                           |                                              |
| <b>Favored (%)</b>                         | 99.0                        |                                                                          | 99.2                                                        |                                                           | 98.5                                         |
| <b>PDB accession code</b>                  | 3TX3                        |                                                                          | TBD                                                         |                                                           | TBD                                          |

744

745 Values in parentheses are from the highest resolution shell. R<sub>free</sub> was calculated using 5% of data

746 excluded from refinement.

747

748

749 **Figure 1.**

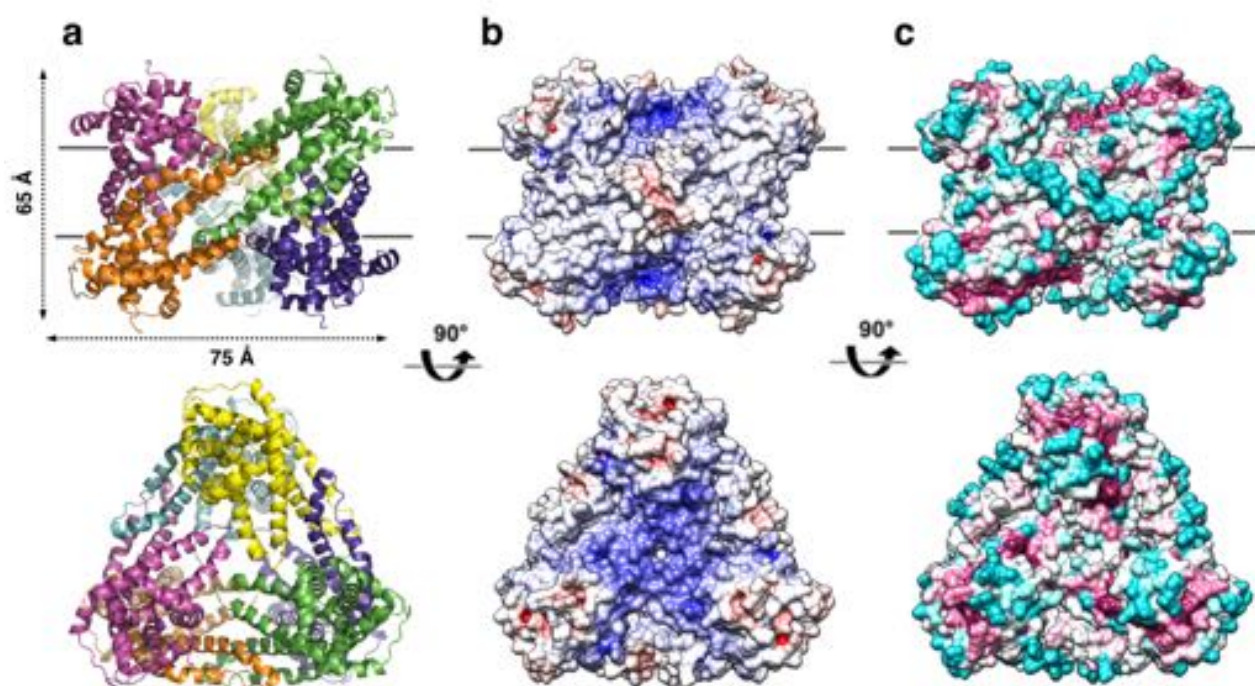

750

751

752 **Fig. 1. Overall structure of the *P. denitrificans* CysZ (PdCysZ) hexamer.** a. Side and top  
753 views of the hexamer as a ribbon diagram with each protomer chain colored differently. The  
754 approximate dimensions of the hexamer marked in Å. b. Side and top views represented by  
755 surface electrostatics as calculated by APBS, with negative and positive surface potential  
756 represented in red and blue respectively. c. Side and top views representing conservation of  
757 residues as calculated by ConSurf, with maroon being most conserved to cyan being least  
758 conserved.

759

760 **Figure 1 – Figure Supplement 1.**

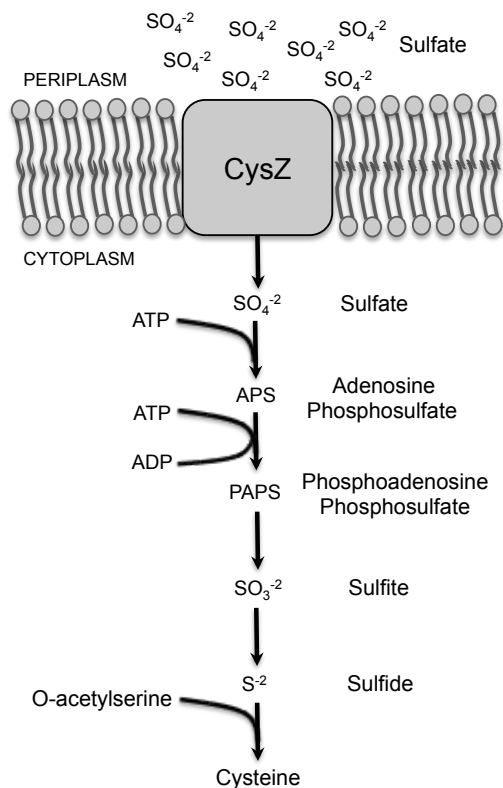

761

762

763 **Fig. 1. S1. Schematic of assimilatory sulfate reduction in bacteria for cysteine biosynthesis.**

764 Assimilatory reduction is energetically dispendious as sulfate is extremely stable. In this  
765 pathway, sulfate ions enter the cell via a transporter or channel, like CysZ; this is followed by its  
766 activation by ATP-sulfurylase, which utilizes ATP to form adenosine phosphosulfate (APS) and  
767 inorganic pyrophosphate (PPi) as a by-product. APS is then further activated by the addition of a  
768 second phosphate forming phosphoadenosine phosphosulfate (PAPS) and this high-energy  
769 intermediate product is poised for sulfur removal to form sulfite ( $\text{SO}_3^{2-}$ ) by the thioredoxin  
770 enzyme, which is then further reduced to sulfide ions ( $\text{S}^{2-}$ ). Sulfide, the final reduced sulfur  
771 product, can then be used in a variety of ways by the cell, such as the incorporation into O-  
772 acetylserine to synthesize cysteine.

773 **Figure 1 – Figure Supplement 2.**

**a**

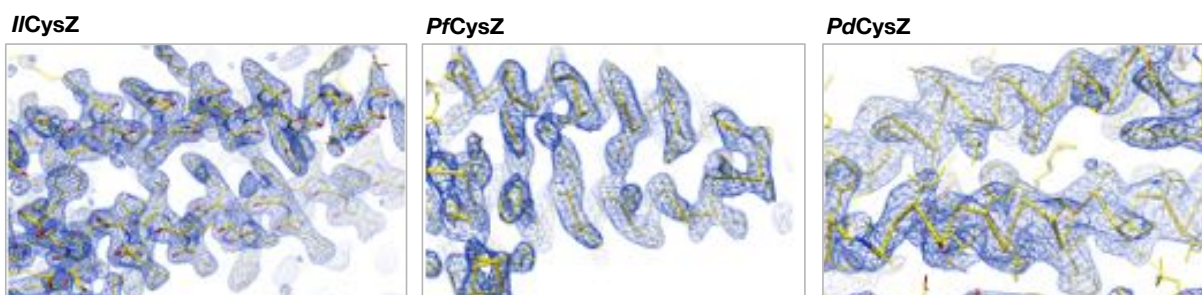

**b**

*PdCysZ* Crystal Forms:

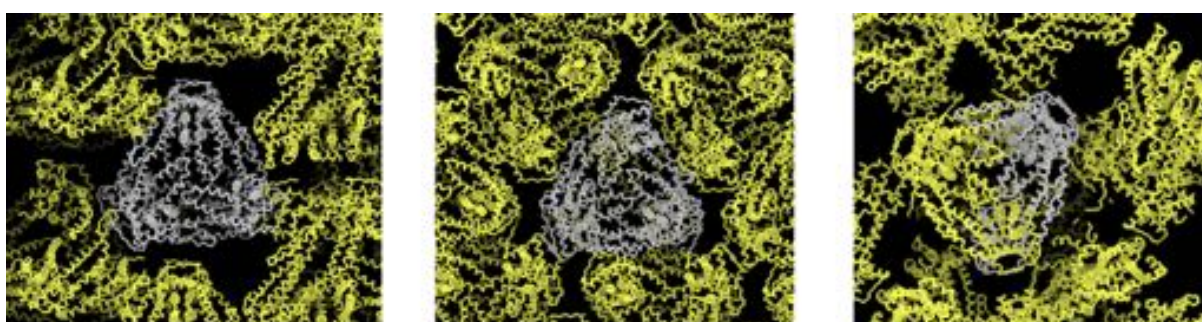

$P6_3$   
 $a=b=225, c=97$

$P2_12_1$   
 $a=74, b=105, c=252$

$P4_12_2$   
 $a=b=111, c=203$

774

775

776 **Fig. 1. S2. Representative electron density of the crystal structures of *IICysZ*, *PfCysZ* and**

777 ***PdCysZ*, and the different crystal forms observed for *PdCysZ*.** a. Representative electron

778 density in blue mesh for: *IICysZ*, contoured at 1 x r.m.s.d., *PfCysZ*, contoured at 2 x r.m.s.d, with

779 a negative B-factor of  $-100 \text{ \AA}^2$  applied to map; *PdCysZ*, contoured at 1 x r.m.s.d, with a negative

780 B-factor of  $-100 \text{ \AA}^2$  applied to map. Final atomic models ( $C\alpha$  trace with side chains depicted) are

781 shown as yellow stick representation. b. Preliminary molecular replacement analyses of the 3

782 different crystal forms obtained for *PdCysZ*, showing the hexameric assembly of the molecule,

783 seen in each case. The  $C\alpha$  trace of an asymmetric unit in each case is depicted in grey, with their

784 symmetry mates are shown in yellow. Space group and unit cell dimensions are listed below.



794 membrane. c. Sequence alignment of *E. coli* CysZ (*EcCysZ*), *P. denitrificans* CysZ (*PdCysZ*), *P.*  
795 *fragi* CysZ (*PfCysZ*), and *I. loihiensis* CysZ (*IlCysZ*). Residues are colored based on  
796 conservation, with maroon being most conserved and cyan least conserved, as calculated by  
797 ConSurf using a sequence alignment of 150 non-redundant sequences from the CysZ family as  
798 input. Spirals above residues mark the extent of the helical segments based on the atomic  
799 structure of *PdCysZ* with helices numbered H1-H8; letters mark residue identities; black dots  
800 above identify every tenth residue (modulo 10) in the *PdCysZ* sequence and black underlines  
801 mark functionally relevant motifs discussed in the text.

802 **Figure 3.**

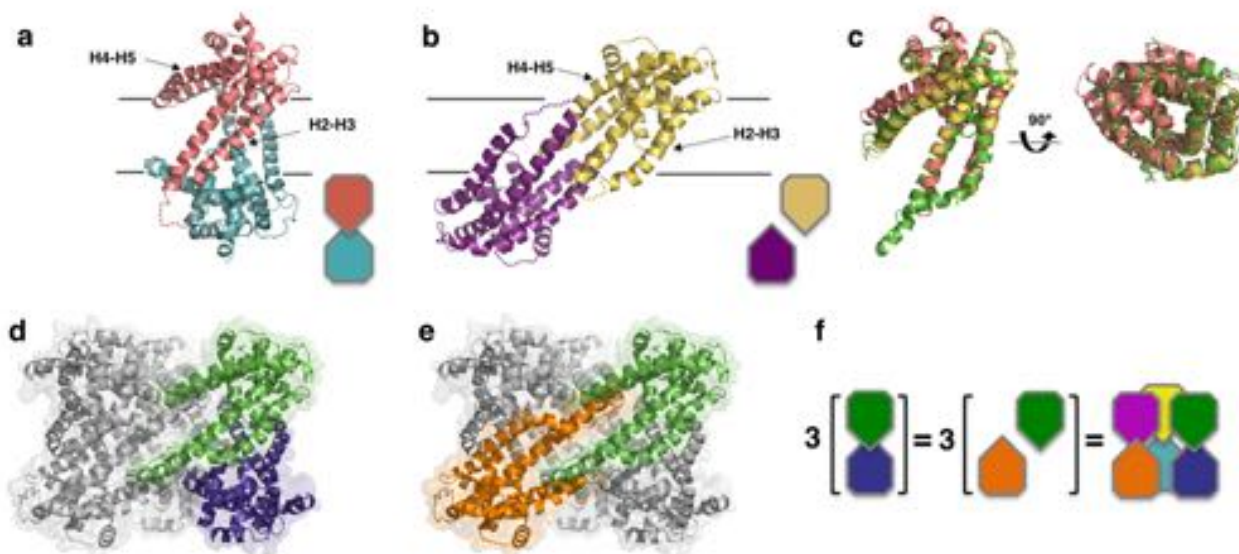

803

804

805 **Fig. 3. Structures of *IICysZ* and *PfCysZ*, with comparison to *PdCysZ*** a. Ribbon diagram of  
 806 the structure of CysZ from *I. loihiensis* (*IICysZ*) at 2.3 Å. Protomers of the dimer are colored in  
 807 salmon pink and teal blue, arranged in a head-to-tail conformation in the membrane, with helical  
 808 hairpins H2-3 and H4-5 labeled for clarity. The dimer interface of *IICysZ* involves H2-3. b.  
 809 Ribbon diagram of the structure of CysZ from *P. fragi* (*PfCysZ*) at 3.2 Å. The protomers of the  
 810 dual topology dimer in the membrane are colored gold and purple, with helical hairpins H2-3 and  
 811 H4-5 again labeled. The dimer interface here involves the interaction of helices H4-5 of each  
 812 protomer. c. Side and top views of the superposition of the three different protomers from  
 813 *PdCysZ* (green), *IICysZ* (pink) and *PfCysZ* (yellow) after aligning H1-H3. d, e. The same dimer  
 814 interfaces observed in *IICysZ* (a) and *PfCysZ* (b) observed in the hexameric assembly of  
 815 *PdCysZ*, as highlighted in green and blue (d) and green and orange (e). f. Schematic  
 816 representation showing how three copies of the dimeric protomers of *IICysZ* (green and blue,



817 left) and of *PfCysZ* (orange and green, center), can coexist in and each recapitulate the  
818 hexameric assembly of *PdCysZ*.

819 **Figure 3 – Figure Supplement 1.**

820

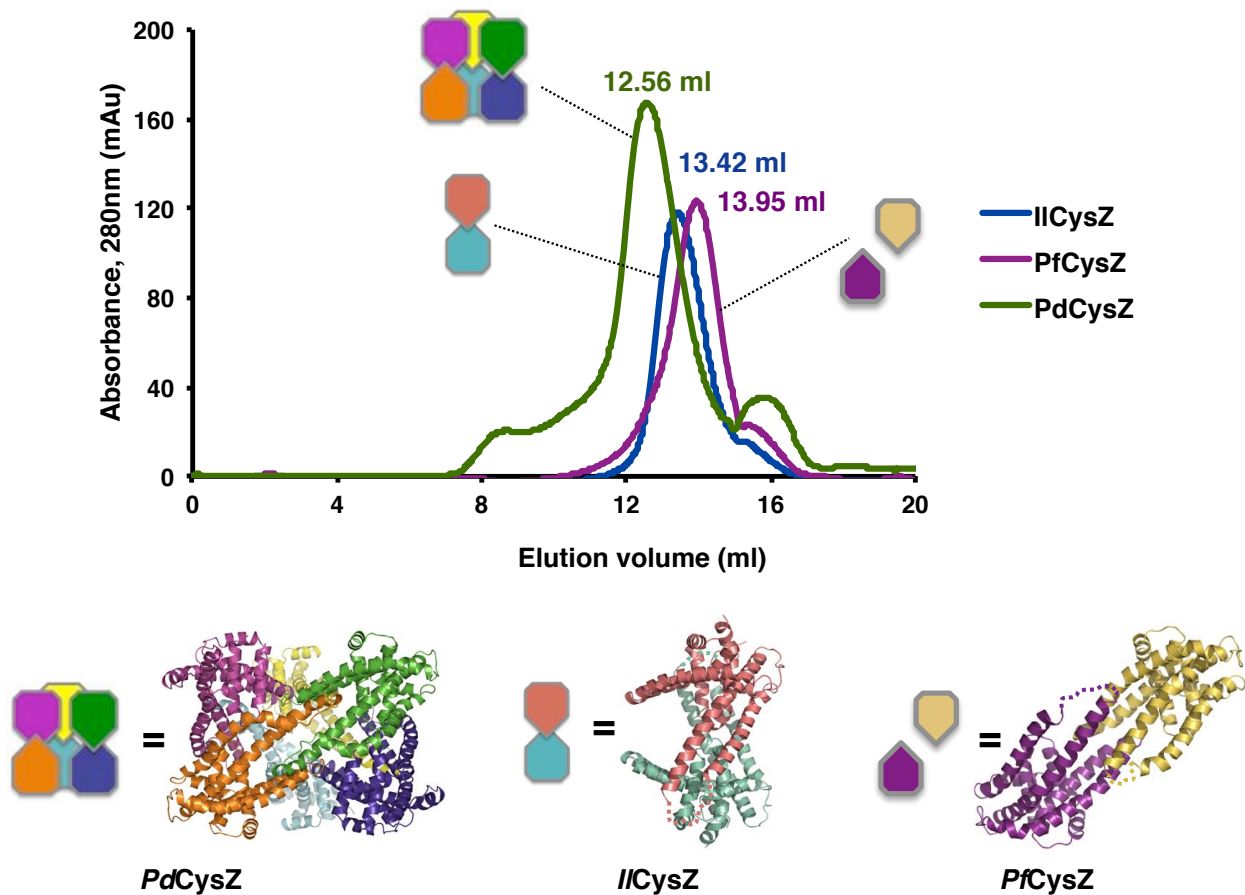

823 **Fig. 3. S1. Size-exclusion chromatography of CysZ shows a mono-disperse elution profile**

824 **for each of the three species purified - PdCysZ, PfCysZ and IICysZ.** All three proteins were

825 solubilized from isolated membrane fractions purified in the presence of 0.2% decyl

826 maltopyranoside (DeM) and exchanged into buffer containing 1%  $\beta$ -octyl glucopyranoside ( $\beta$ -

827 OG) on the size-exclusion column (Superdex 200 10/30 HR). A schematic of the oligomeric

828 states observed in the three crystal structures of CysZ are shown below the elution profiles.

829 Crystallization trials were set-up directly after the size-exclusion chromatography step. A shift of

830 ~1 ml was observed for the elution of *PdCysZ* (peak at 12.56 ml), with respect to *PfCysZ* and  
831 *IICysZ*, indicating that the size (volume) and shape of *PdCysZ* is significantly larger than the  
832 other two species. *IICysZ* elutes at 13.42 ml, 0.5 ml ahead of *PfCysZ*, which could be explained  
833 by the shape of *IICysZ*, occupying more volume as compared to *PfCysZ*, with its helices (H4-  
834 H5) pointing outward, away from the body of the dimer.

835

836 **Figure 3 – Figure Supplement 2.**

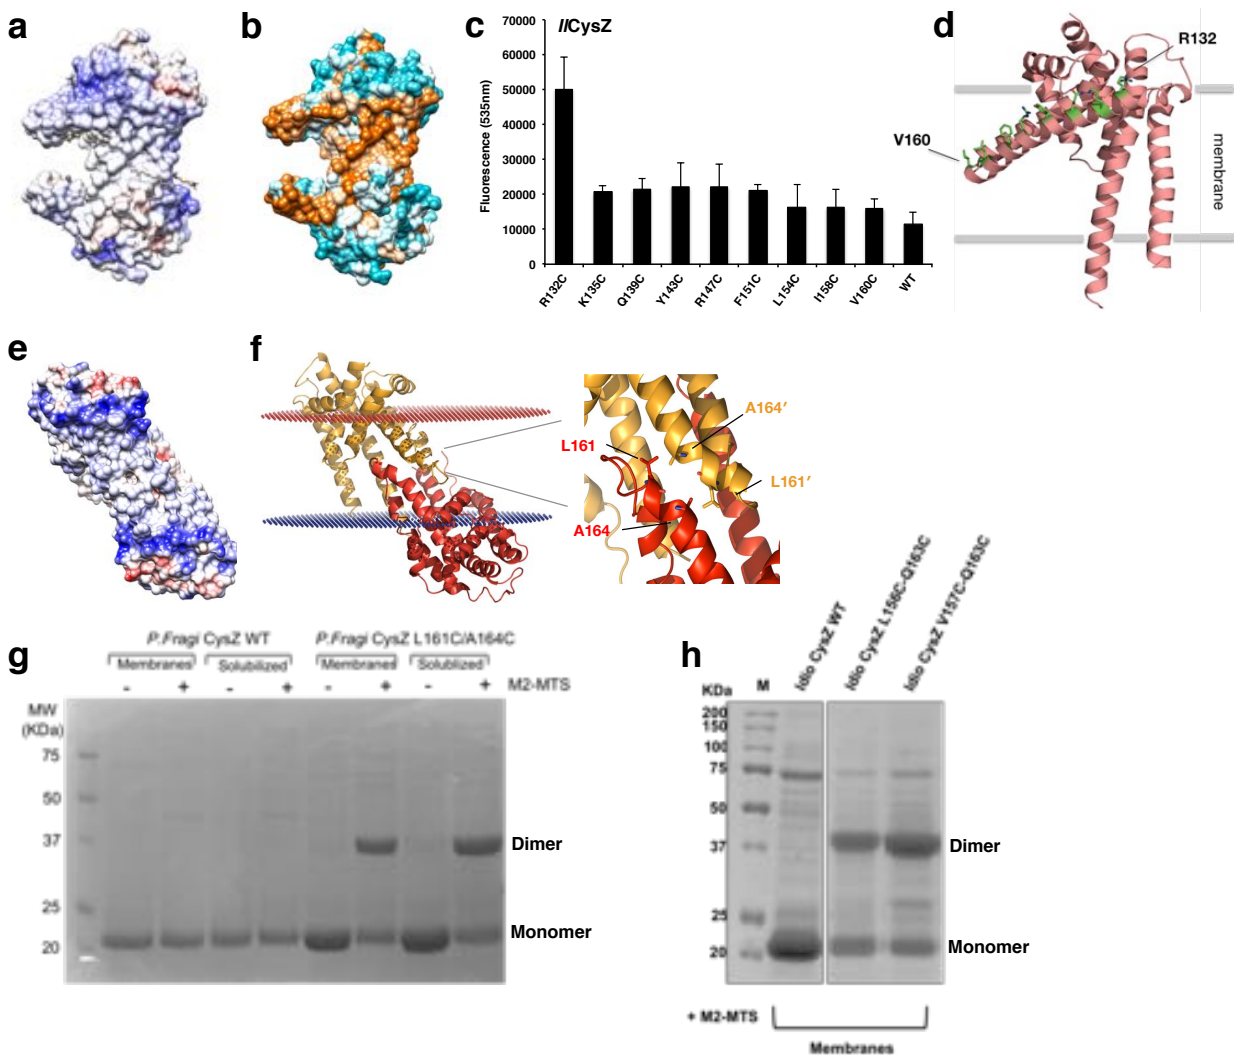

837

838

839 **Fig. 3. S2. Surface electrostatics, hydrophobicity and site-directed fluorescence labeling of**

840 **cysteine mutants located on H4 of *IICysZ*.** a. A depiction of the surface electrostatic potentials

841 of the *IICysZ* dimer with negative surface potential represented in red, and positive potential in

842 blue as calculated by APBS. b. Surface of *IICysZ* rendered by level of hydrophobicity, using the

843 Kyte-Doolittle hydrophobicity scale with cyan being most polar, to orange being most

844 hydrophobic, reveals a hydrophobic belt along the center of the dimer, suggesting the orientation

845 of the dimer in the lipid bilayer. c, d. Single cysteine mutants were designed to be located along

846 the length of helix 4 of CysZ, to gauge the extent of its membrane insertion. The labeled protein  
847 was extracted from the membrane and purified after quenching the labeling reaction.  
848 Fluorescence intensity was measured and quantified by a Tecan fluorescence plate reader at an  
849 excitation of 485nm and emission of 535nm the results of which were plotted on the left, with  
850 error bars representing the standard deviation from the mean for n=3. The results show that of all  
851 the residues on the helix, only R132C (the top-most residue) was accessible to the fluorophore  
852 and hence exposed out of the membrane. d. Locations of the mutated residues on helix H4 are  
853 marked on the model of *IICysZ* in green. Crosslinking of L161C-A164C cysteine mutant of  
854 *PfCysZ* and *IICysZ* exhibits dimer formation. e. A depiction of the surface electrostatic  
855 potentials of the *PfCysZ* dimer with negative surface potential represented in red, and positive  
856 potential in blue as calculated by APBS, highlights hydrophobic belt marking the orientation of  
857 the *PfCysZ* dimer in the membrane. f. Membrane orientation of *PfCysZ* predicted by OPM/PPM  
858 server shows its 31-degree tilt to the perpendicular, with a zoomed in view of the location of the  
859 cysteine mutants at the dimer interface, used for crosslinking of the dimer. g. h. Dimer formation  
860 by the crosslinking of *PfCysZ* (g) and *IICysZ* (h) with introduced structure-based cysteine  
861 substitution mutations in the H4-H5 dimer interface. Analogous pairs of cysteine mutants from  
862 each species are shown here: *PfCysZ* L161C-A164C and *IICysZ* L156C-Q163C and V157C-  
863 Q163C. Sulfhydryl specific Bis-MTS crosslinkers of a certain spacer length (in this case 5.2Å)  
864 were used at 0.5mM for 1hour at room temperature to crosslink the protein. Experiment was  
865 performed on protein in the membrane, as well as on solubilized protein. WT protein (cysteine-  
866 less) was used as a control. Proteins were purified after stopping the reaction, and run on an SDS  
867 PAGE with reducing dye, and stained with Coomassie blue.  
868

869 **Figure 4.**

870

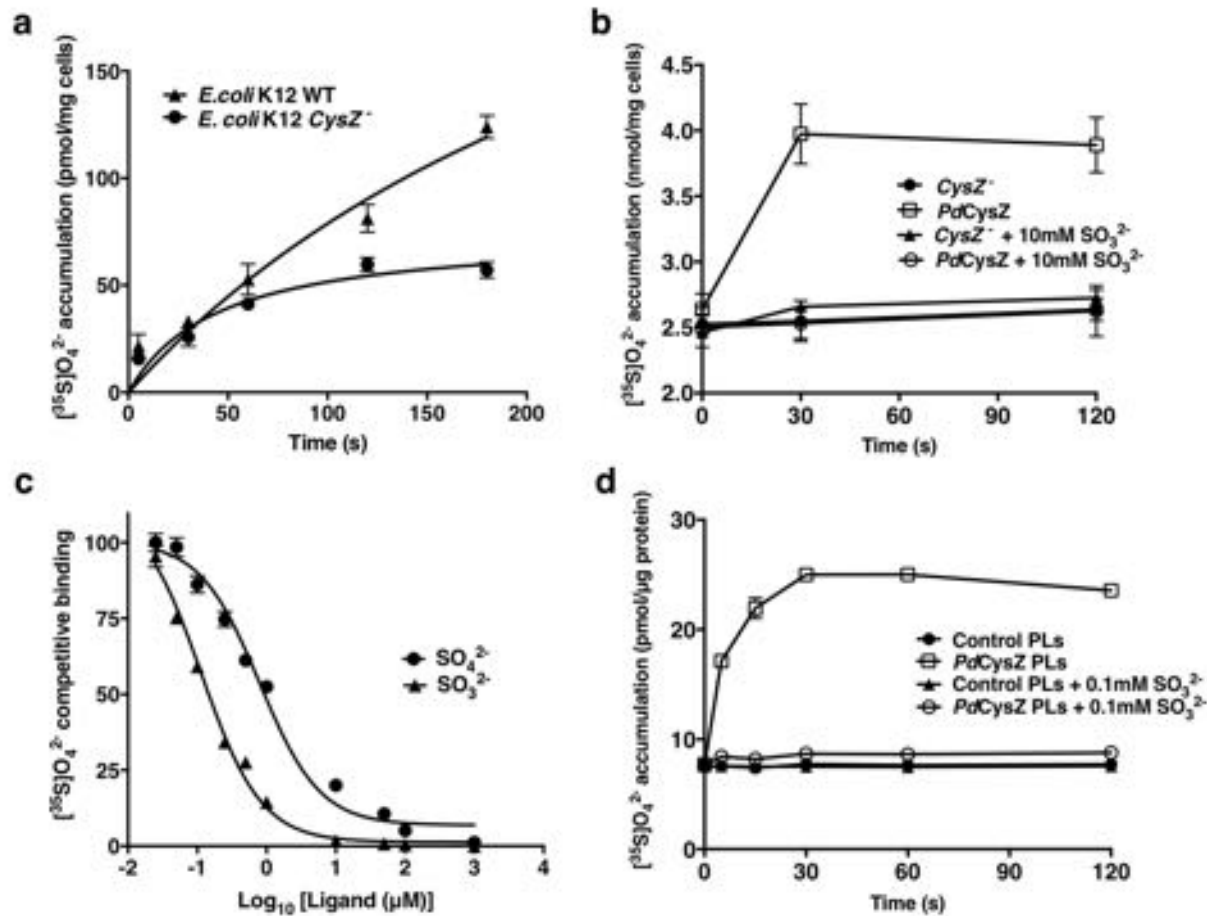

871

872

873 **Fig. 4. Functional characterization of CysZ.** a. Time course of [<sup>35</sup>S]O<sub>4</sub><sup>2-</sup> uptake (320 μM) by  
 874 cells of WT *E. coli* K12 (strain BW25113) and by *CysZ*<sup>-</sup> (strain JW2406-1) cells (n=3). b. Sulfite  
 875 inhibition of sulfate uptake. Radiolabeled sulfate (320 μM [<sup>35</sup>S]O<sub>4</sub><sup>2-</sup>) uptake is rescued in the  
 876 same *cysZ* knockout strain by transformation with an expression vector for *PdCysZ* whereas the  
 877 control cells were transformed with an empty vector. Sulfate uptake is inhibited by the addition  
 878 of 10 mM SO<sub>3</sub><sup>2-</sup> (n=3). c. Competitive binding of labeled sulfate in presence of unlabeled  
 879 ligands. The inhibition of labeled sulfate (7 nM [<sup>35</sup>S]O<sub>4</sub><sup>2-</sup>) binding by non-labeled sulfate or

880 sulfite is measured by the scintillation proximity assay using purified *PdCysZ* (n=3). *PdCysZ*  
881 binds  $\text{SO}_4^{2-}$  with an  $EC_{50}$  of  $0.81 \pm 0.045 \mu\text{M}$  and exhibits an  $IC_{50}$  of  $0.12 \pm 0.034 \mu\text{M}$  for  $\text{SO}_3^{2-}$ .  
882 d. Radiolabeled sulfate ( $10 \mu\text{M}$  [ $^{35}\text{S}$ ] $\text{O}_4^{2-}$ ) accumulation into proteoliposomes reconstituted with  
883 detergent-purified *PdCysZ*. Uptake into reconstituted proteoliposomes (open squares) is shown  
884 in comparison with control (empty) liposomes (solid discs). Uptake is inhibited by the presence  
885 of  $0.1 \text{ mM SO}_3^{2-}$  (n=3).  
886

887 **Figure 4 – Figure Supplement 1.**

888

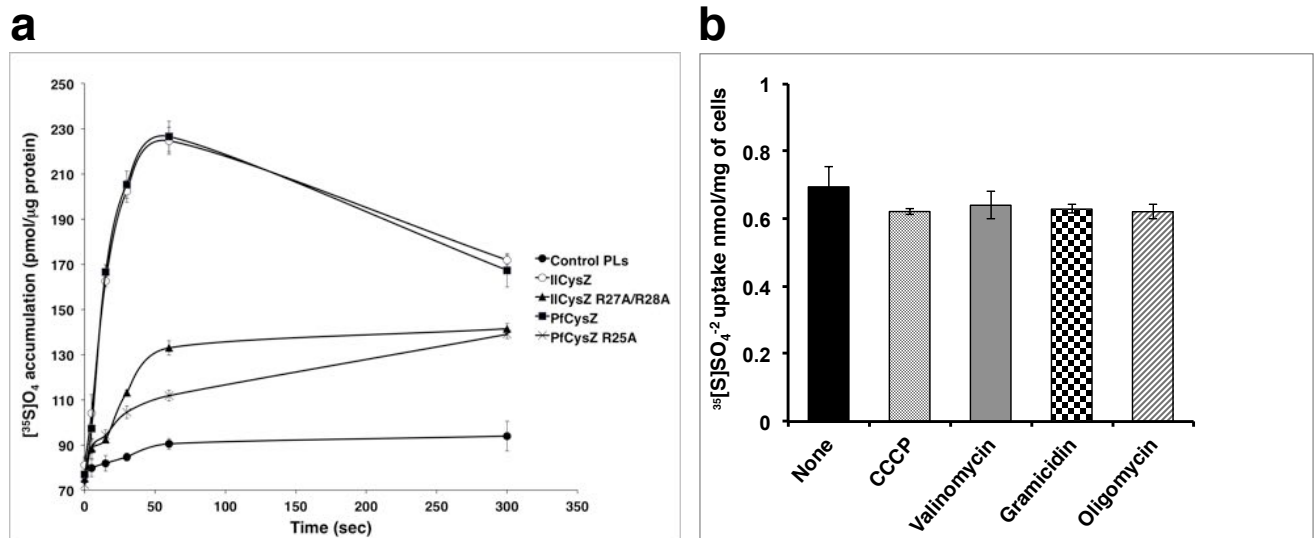

889

890

891 **Fig. 4. S1. a. Radiolabeled sulfate ( $10 \mu\text{M}$   $^{35}\text{S}]\text{O}_4^{2-}$ ) accumulation is measured from**  
892 **detergent purified *IlCysZ* and *PfCysZ* reconstituted in proteoliposomes, in comparison to**  
893 **the control (empty) liposomes. Sulfate-binding site alanine mutants (*IlCysZ* R27A/R28A and**  
894 ***PfCysZ* R25A) display a significantly diminished sulfate uptake capability. Error bars represent**  
895 **the standard deviation from the mean (SEM), for n=3. b. Effect of uncouplers and ionophores on**  
896 **the sulfate accumulation by *CysZ*. *IlCysZ* expressed in the *E. coli* knockout strain shows**  
897 **unchanged sulfate uptake levels in the presence of the uncouplers CCCP and oligomycin or the**  
898 **ionophores gramicidin and valinomycin. Sulfate accumulation was measured in triplicate at pH 7**  
899 **and total accumulation was plotted after a 10 s incubation. Error bars were calculated by standard**  
900 **deviation from the mean, for n=3.**

901



902 **Figure 4 – Figure Supplement 2.**

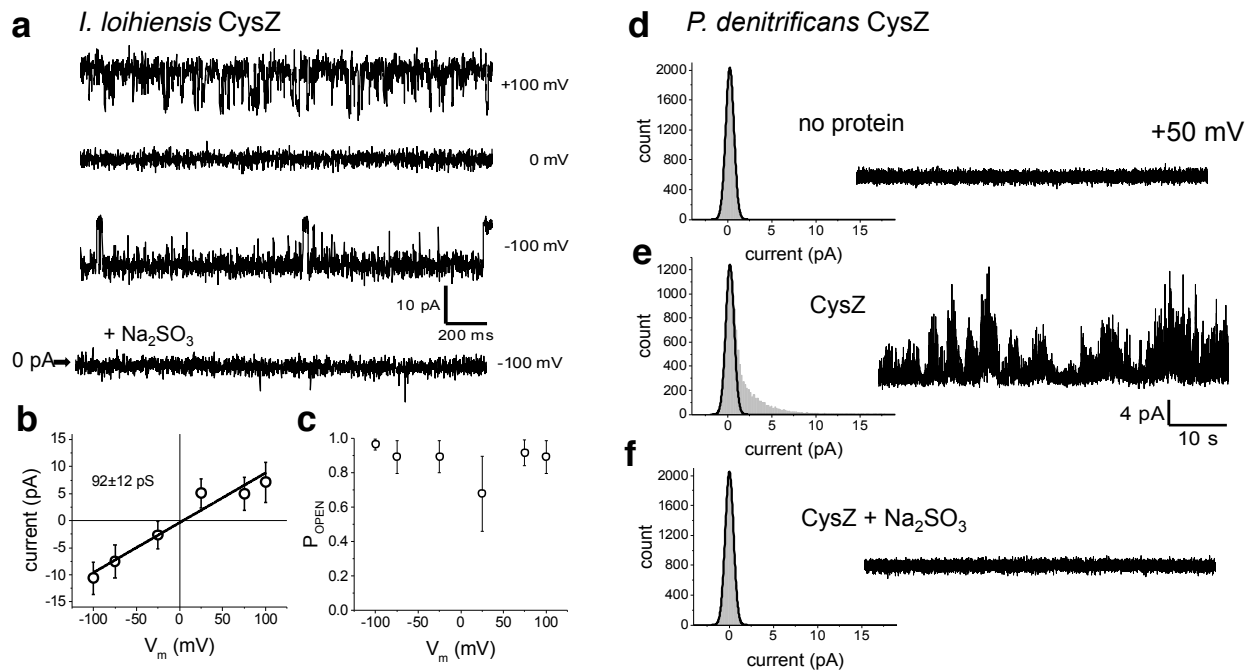

903

904

905 **Fig. 4. S2. Reconstitution of CysZ in planar lipid bilayers yields sulfite-sensitive**

906 **conductances.** a. Sample traces of *IiCysZ* under 150 mM symmetrical  $\text{Na}_2\text{SO}_4$  solutions at the

907 indicated membrane potentials and pH = 5.4. The lowest trace shows inhibition of activity by 15

908  $\mu\text{M}$   $\text{Na}_2\text{SO}_3$ . b. Unitary conductance estimated at  $92 \pm 12$  pS with a reversal potential ( $E_{\text{rev}}$ ) at 0

909 mV. c. Unitary open probability does not change as a function of membrane potential, and is

910 stable at an average  $P_{\text{OPEN}} = 0.8$ . d. Stable bilayer recording at a membrane potential  $V_m = +50$

911 mV, with no protein reconstituted. An all point current amplitude histogram is plotted on the left

912 of the trace. The peak of the normal distribution denotes the baseline zero current. e.

913 Reconstitution of *PdCysZ* under 150 mM symmetrical  $\text{Na}_2\text{SO}_4$  solutions at +50 mV. An all point

914 current amplitude histogram is plotted on the left of the trace. The high frequency activity shows

915 a poorly resolved distribution of unitary currents above baseline. f. Inhibition of activity by 5  $\mu\text{M}$

916  $\text{Na}_2\text{SO}_3$ . An all point current amplitude histogram is plotted on the left of the trace. Sulfite  
917 inhibited activity back to baseline levels.

918

919 **Figure 5.**

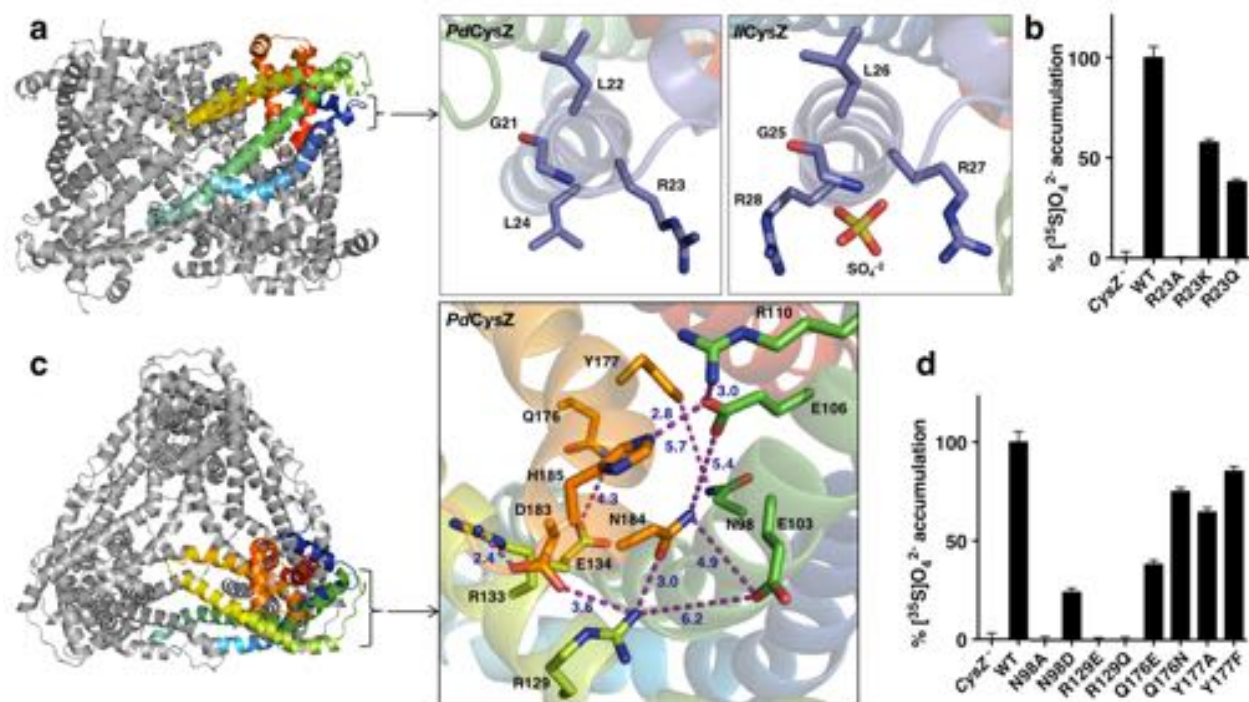

920

921

922 **Fig. 5. Functionally relevant features of the CysZ molecule** a. Side-view of a ribbon diagram  
 923 of the *PdCysZ* hexamer, with one chain rainbow-colored from N- (blue) to C-termini (red).  
 924 Insets show the sulfate-binding site located at the start of H2a in *PdCysZ* (left), with conserved  
 925 residues G21, L22, R23 and L24 labeled, and the corresponding site in *IlcysZ* (right), with  
 926 residues G25, L26, R27, and R28 labeled and showing the  $\text{SO}_4^{2-}$  ion as bound in the crystal  
 927 structure. b. Sulfate uptake by sulfate-binding site mutants of *PdCysZ*. *E. coli K12 CysZ* cells  
 928 transformed with the listed *PdCysZ* R23 mutants were used to measure  $^{35}\text{S}[\text{O}_4]^{2-}$  uptake (n=3).  
 929 Sulfate uptake was abolished for R23A, and rescued to 50% and 40% of the wild type levels for  
 930 the R23K and R23Q mutants respectively. c. A top-view of the *PdCysZ* hexamer, colored as in a.  
 931 The inset magnifies the central core of CysZ to show the associated network of hydrogen bonds  
 932 (R129-N184, E106-H185), van der Waals interactions (E103-N184, E106-N184, Q176-E134)

933 and salt bridges (R129-D183, R133-D183, R110-E106) between pairs of highly conserved  
934 residues. Interatomic contacts are shown as purple dotted lines with distances (in Å) marked in  
935 blue. d. Sulfate uptake by central-core mutants of *PdCysZ*. *E. coli K12 CysZ* cells transformed  
936 with the listed *PdCysZ* mutants were used to measure [<sup>35</sup>S]O<sub>4</sub><sup>-2</sup> uptake (n=3). N98A and R129E  
937 and R129Q showed severely impaired sulfate uptake, whereas more conservative substitutions  
938 such as N98D, Q176E and Q176N had less of a negative effect on function. Y177A and Y177F  
939 do not show any impaired function.  
940

941 **Figure 6.**

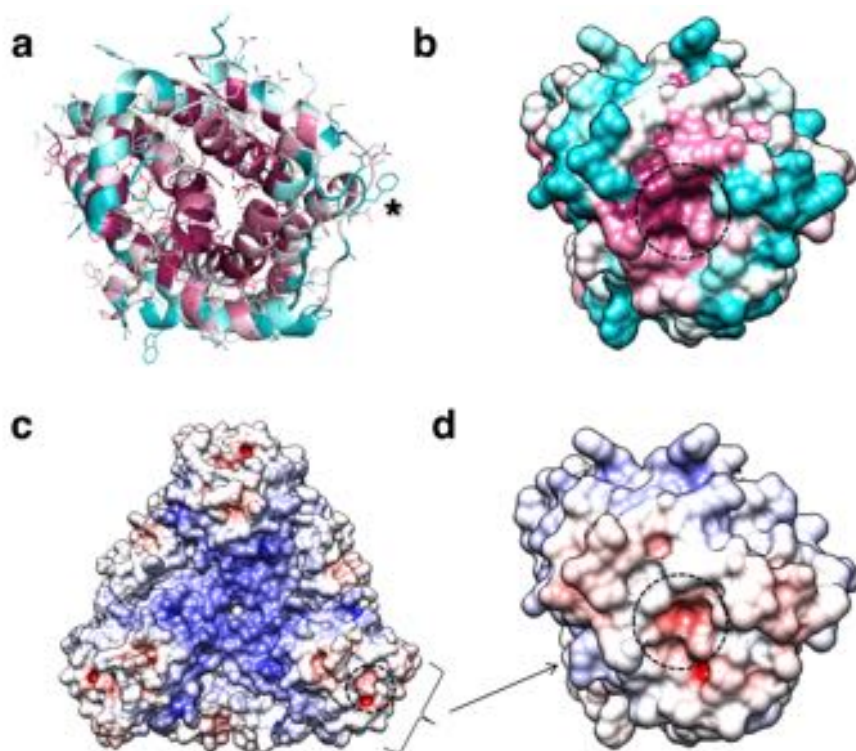

942

943

944 **Fig. 6. Conservation and entrance of putative pore of *PdCysZ*.** a. Ribbon diagram colored by  
945 conservation with residues in maroon being most conserved to cyan being least conserved  
946 (calculated by ConSurf) to highlight the entrance to the putative pore; an asterisk (\*) marks the  
947 location of the sulfate-binding site (GLR motif) at top of H2a. b. Same view and coloring scheme  
948 as in a, but now shown in surface representation. c. Electrostatic representation of hexameric  
949 *PdCysZ* as viewed from the top, with negative surface potential represented in red, and positive  
950 potential in blue as calculated by APBS, with location of the putative pore marked by a dashed  
951 circle. d. Close-up view in electrostatic representation of the putative pore within a *PdCysZ*  
952 protomer, surface and orientation as in b.

953

954 **Figure 7.**

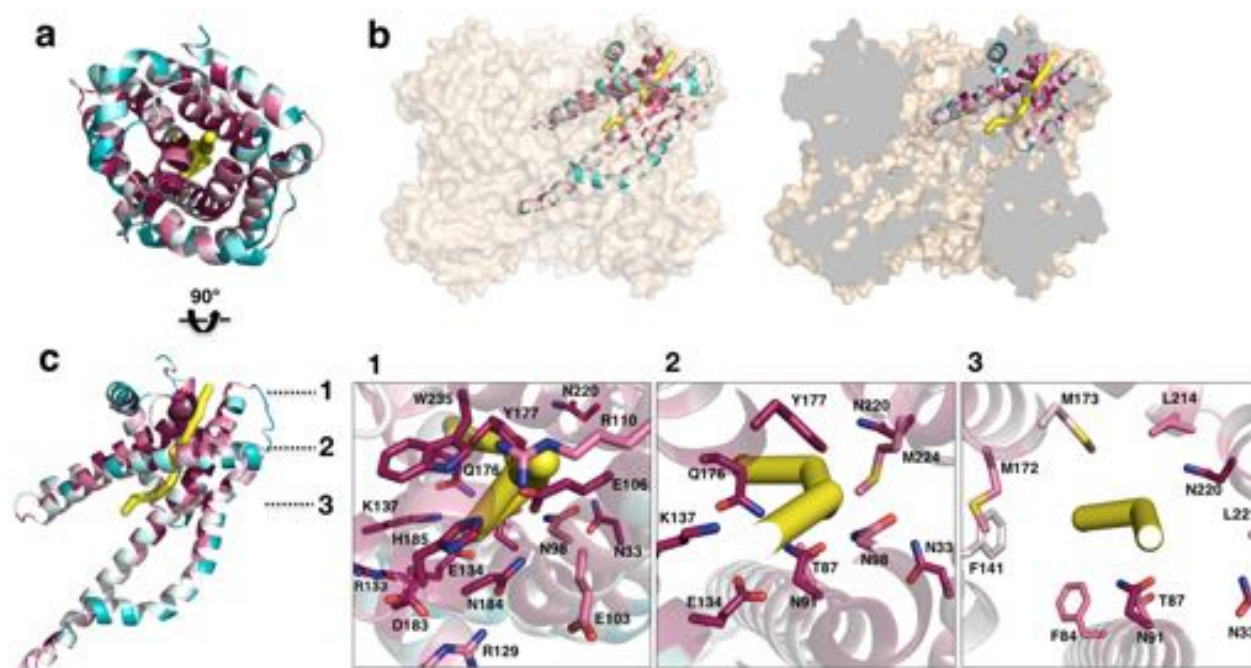

955

956

957 **Fig. 7. Putative ion conductance pathway of CysZ.** a. A *PdCysZ* protomer looking into the  
958 incipient pore entrance. The polypeptide ribbon is oriented as in 6a and colored by level of  
959 sequence conservation (calculated by ConSurf, with maroon being most conserved and cyan  
960 least). The putative pore and ion conduction pathway is shown as a yellow tube of 1 Å diameter,  
961 calculated by PoreWalker. b. Surface representation of the *PdCysZ* hexamer, as side views, both  
962 semi-transparent (left) and with surface clipped (right, cut surfaces colored in grey) to allow for  
963 the internal visualization of the pathway leading to the central cavity. c. Side view of a *PdCysZ*  
964 protomer left, viewed as in b and rotated 90° from a. Insets show magnified views of cross-  
965 sections along the pathway: At level 1, the entrance to the pore consists of a narrow constriction  
966 created by a network of highly conserved polar and charged residues (E106, R110, E134, N184,  
967 H185) tightly interacting with one another. At level 2, the pathway broadens and becomes less

968 charged, but yet polar in nature as lined by conserved asparagine, tyrosine and threonine residues  
969 (N33, T87, N91, N98, Q176, Y177). From level 3, the pathway widens further and ultimately  
970 leads into the large central hydrophobic cavity.

971

972 **Figure 7 – Figure Supplement 1.**

973

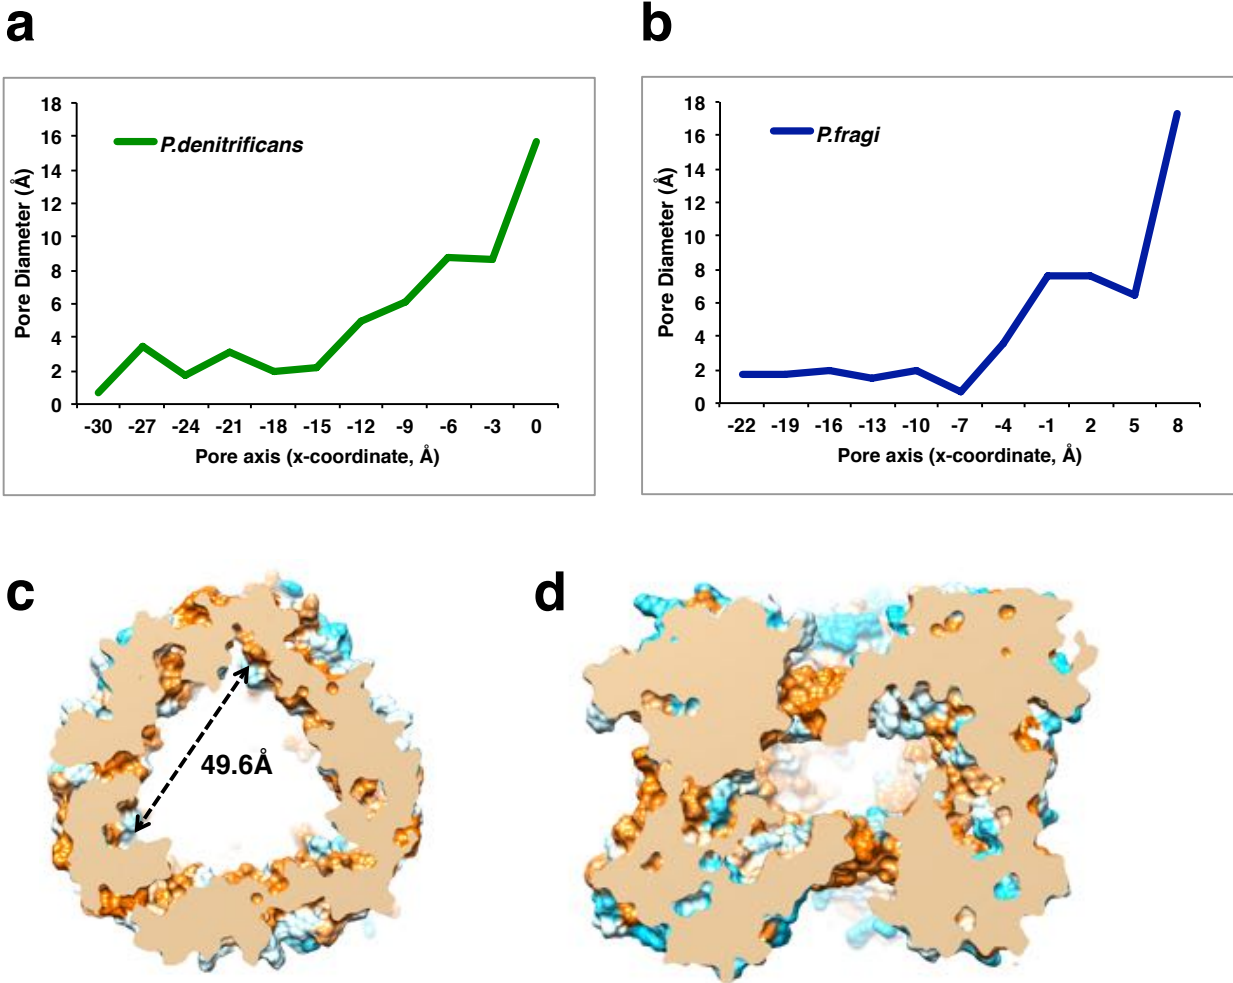

974  
975

976 **Fig. 7. S1. Plot of the pore diameter of the putative ion conduction pathway. a. *PdCysZ* b.**  
977 *PfCysZ*, showing a very narrow constriction of under 2 Å in diameter near the entrance of the  
978 pore, which then widens as the ions move past the core of the protomer to the inner central cavity  
979 of the hexameric channel (as calculated by PoreWalker, measured at 3 Å steps along the x-axis)  
980 c. Central hydrophobic cavity of *PdCysZ* hexamer, cross-section of central cavity of the  
981 hexameric *PdCysZ* (top view) and d. side view, shows a triangular-shaped cavity with each side



982 measuring 49.6 Å in length. The cavity is primarily hydrophobic, as depicted and colored with  
983 the Kyte-Doolittle hydrophobicity scale from most polar colored in cyan to most hydrophobic  
984 colored in orange.

985

986 **References:**

- 987
- 988 Adams, P. D., Afonine, P. V., Bunkoczi, G., Chen, V. B., Davis, I. W., Echols, N., Headd, J. J.,  
989 Hung, L. W., Kapral, G. J., Grosse-Kunstleve, R. W., McCoy, A. J., Moriarty, N. W.,  
990 Oeffner, R., Read, R. J., Richardson, D. C., Richardson, J. S., Terwilliger, T. C., &  
991 Zwart, P. H. (2010). PHENIX: a comprehensive Python-based system for  
992 macromolecular structure solution. *Acta Crystallogr D Biol Crystallogr*, 66(Pt 2), 213-  
993 221. doi:S0907444909052925 [pii]  
994 [10.1107/S0907444909052925](https://doi.org/10.1107/S0907444909052925)
- 995 Aguilar-Barajas, E., Diaz-Perez, C., Ramirez-Diaz, M. I., Riveros-Rosas, H., & Cervantes, C.  
996 (2011). Bacterial transport of sulfate, molybdate, and related oxyanions. *Biometals*, 24(4),  
997 687-707. doi:10.1007/s10534-011-9421-x
- 998 Akabas, M. H., Stauffer, D. A., Xu, M., & Karlin, A. (1992). Acetylcholine receptor channel  
999 structure probed in cysteine-substitution mutants. *Science*, 258(5080), 307-310.
- 1000 Amadi, S. T., Koteiche, H. A., Mishra, S., & McHaourab, H. S. (2010). Structure, dynamics, and  
1001 substrate-induced conformational changes of the multidrug transporter EmrE in  
1002 liposomes. *J Biol Chem*, 285(34), 26710-26718. doi:10.1074/jbc.M110.132621
- 1003 Anishkin, A., Akitake, B., Kamaraju, K., Chiang, C. S., & Sukharev, S. (2010). Hydration  
1004 properties of mechanosensitive channel pores define the energetics of gating. *J Phys*  
1005 *Condens Matter*, 22(45), 454120. doi:10.1088/0953-8984/22/45/454120
- 1006 Aryal, P., Sansom, M. S., & Tucker, S. J. (2015). Hydrophobic Gating in Ion Channels. *Journal*  
1007 *of Molecular Biology*, 427(1), 121-130. doi:10.1016/j.jmb.2014.07.030
- 1008 Ashkenazy, H., Abadi, S., Martz, E., Chay, O., Mayrose, I., Pupko, T., & Ben-Tal, N. (2016).  
1009 ConSurf 2016: an improved methodology to estimate and visualize evolutionary  
1010 conservation in macromolecules. *Nucleic Acids Res*, 44(W1), W344-350.  
1011 doi:10.1093/nar/gkw408
- 1012 Aslanidis, C., & de Jong, P. J. (1990). Ligation-independent cloning of PCR products (LIC-  
1013 PCR). *Nucleic Acids Res*, 18(20), 6069-6074.
- 1014 Baba, T., Ara, T., Hasegawa, M., Takai, Y., Okumura, Y., Baba, M., Datsenko, K. A., Tomita,  
1015 M., Wanner, B. L., & Mori, H. (2006). Construction of Escherichia coli K-12 in-frame,  
1016 single-gene knockout mutants: the Keio collection. *Mol Syst Biol*, 2, 2006 0008.  
1017 doi:10.1038/msb4100050
- 1018 Barton, L. L. (2005) *Structural and Functional Relationships in Prokaryotes* (pp. 680-720):  
1019 Springer.
- 1020 Bass, R. B., Strop, P., Barclay, M., & Rees, D. C. (2002). Crystal structure of Escherichia coli  
1021 MscS, a voltage-modulated and mechanosensitive channel. *Science*, 298(5598), 1582-  
1022 1587. doi:10.1126/science.1077945
- 1023 Birkner, J. P., Poolman, B., & Kocer, A. (2012). Hydrophobic gating of mechanosensitive  
1024 channel of large conductance evidenced by single-subunit resolution. *Proc Natl Acad Sci*  
1025 *U S A*, 109(32), 12944-12949. doi:10.1073/pnas.1205270109
- 1026 Britton, P., Boronat, A., Hartley, D. A., Jones-Mortimer, M. C., Kornberg, H. L., & Parra, F.  
1027 (1983). Phosphotransferase-mediated regulation of carbohydrate utilization in  
1028 Escherichia coli K12: location of the gsr (tgs) and iex (crr) genes by specialized  
1029 transduction. *J Gen Microbiol*, 129(2), 349-356.

- 1030 Buckler, K. J., & Vaughan-Jones, R. D. (1998). Effects of mitochondrial uncouplers on  
1031 intracellular calcium, pH and membrane potential in rat carotid body type I cells. *J*  
1032 *Physiol*, *513* (Pt 3), 819-833.
- 1033 Chen, Y. H., Hu, L., Punta, M., Bruni, R., Hillerich, B., Kloss, B., Rost, B., Love, J.,  
1034 Siegelbaum, S. A., & Hendrickson, W. A. (2010). Homologue structure of the SLAC1  
1035 anion channel for closing stomata in leaves. *Nature*, *467*(7319), 1074-1080.  
1036 doi:10.1038/nature09487  
1037 nature09487 [pii]
- 1038 Cowtan, K. D., & Zhang, K. Y. (1999). Density modification for macromolecular phase  
1039 improvement. *Prog Biophys Mol Biol*, *72*(3), 245-270.
- 1040 Czodrowski, P., Dramburg, I., Sotriffer, C. A., & Klebe, G. (2006). Development, validation, and  
1041 application of adapted PEOE charges to estimate pKa values of functional groups in  
1042 protein-ligand complexes. *Proteins*, *65*(2), 424-437. doi:10.1002/prot.21110
- 1043 Davis, B. D., & Mingioli, E. S. (1950). Mutants of Escherichia coli requiring methionine or  
1044 vitamin B12. *J Bacteriol*, *60*(1), 17-28.
- 1045 Dolinsky, T. J., Czodrowski, P., Li, H., Nielsen, J. E., Jensen, J. H., Klebe, G., & Baker, N. A.  
1046 (2007). PDB2PQR: expanding and upgrading automated preparation of biomolecular  
1047 structures for molecular simulations. *Nucleic Acids Res*, *35*(Web Server issue), W522-  
1048 525. doi:10.1093/nar/gkm276
- 1049 Dolinsky, T. J., Nielsen, J. E., McCammon, J. A., & Baker, N. A. (2004). PDB2PQR: an  
1050 automated pipeline for the setup of Poisson-Boltzmann electrostatics calculations.  
1051 *Nucleic Acids Res*, *32*(Web Server issue), W665-667. doi:10.1093/nar/gkh381
- 1052 Doyle, D. A., Morais Cabral, J., Pfuetzner, R. A., Kuo, A., Gulbis, J. M., Cohen, S. L., Chait, B.  
1053 T., & MacKinnon, R. (1998). The structure of the potassium channel: molecular basis of  
1054 K<sup>+</sup> conduction and selectivity. *Science*, *280*(5360), 69-77.
- 1055 Emsley, P., Lohkamp, B., Scott, W. G., & Cowtan, K. (2010). Features and development of  
1056 Coot. *Acta Crystallogr D Biol Crystallogr*, *66*(Pt 4), 486-501. doi:S0907444910007493  
1057 [pii]  
1058 [10.1107/S0907444910007493](https://doi.org/10.1107/S0907444910007493)
- 1059 Evans, P. (2006). Scaling and assessment of data quality. *Acta Crystallogr D Biol Crystallogr*,  
1060 *62*(Pt 1), 72-82. doi:10.1107/S0907444905036693
- 1061 Glaser, F., Pupko, T., Paz, I., Bell, R. E., Bechor-Shental, D., Martz, E., & Ben-Tal, N. (2003).  
1062 ConSurf: identification of functional regions in proteins by surface-mapping of  
1063 phylogenetic information. *Bioinformatics*, *19*(1), 163-164.
- 1064 Hanahan, D. (1983). Studies on transformation of Escherichia coli with plasmids. *Journal of*  
1065 *Molecular Biology*, *166*(4), 557-580.
- 1066 Hryniewicz, M., Sirko, A., Palucha, A., Bock, A., & Hulanicka, D. (1990). Sulfate and  
1067 thiosulfate transport in Escherichia coli K-12: identification of a gene encoding a novel  
1068 protein involved in thiosulfate binding. *J Bacteriol*, *172*(6), 3358-3366.
- 1069 Kabsch, W. (2010). Xds. *Acta Crystallogr D Biol Crystallogr*, *66*(Pt 2), 125-132.  
1070 doi:10.1107/S0907444909047337
- 1071 Kertesz, M. A. (2000). Riding the sulfur cycle--metabolism of sulfonates and sulfate esters in  
1072 gram-negative bacteria. *FEMS Microbiol Rev*, *24*(2), 135-175.
- 1073 Kertesz, M. A. (2001). Bacterial transporters for sulfate and organosulfur compounds. *Res*  
1074 *Microbiol*, *152*(3-4), 279-290.

1075 Korkhov, V. M., & Tate, C. G. (2009). An emerging consensus for the structure of EmrE. *Acta*  
1076 *Crystallogr D Biol Crystallogr*, 65(Pt 2), 186-192. doi:10.1107/S0907444908036640

1077 Kredich, N. M. (1971). Regulation of L-cysteine biosynthesis in *Salmonella typhimurium*. I.  
1078 Effects of growth of varying sulfur sources and O-acetyl-L-serine on gene expression. *J*  
1079 *Biol Chem*, 246(11), 3474-3484.

1080 Kredich, N. M., Hulanicka, M. D., & Hallquist, S. G. (1979). Synthesis of L-cysteine in  
1081 *Salmonella typhimurium*. *Ciba Found Symp*(72), 87-99.

1082 Krissinel, E., & Henrick, K. (2007). Inference of macromolecular assemblies from crystalline  
1083 state. *Journal of Molecular Biology*, 372(3), 774-797 'Protein interfaces, surfaces and  
1084 assemblies' service PISA at the European Bioinformatics Institute.  
1085 ([http://www.ebi.ac.uk/pdbe/prot\\_int/pistart.html](http://www.ebi.ac.uk/pdbe/prot_int/pistart.html)). doi:10.1016/j.jmb.2007.05.022

1086 Langer, G., Cohen, S. X., Lamzin, V. S., & Perrakis, A. (2008). Automated macromolecular  
1087 model building for X-ray crystallography using ARP/wARP version 7. *Nat Protoc*, 3(7),  
1088 1171-1179. doi:nprot.2008.91 [pii]  
1089 10.1038/nprot.2008.91

1090 Leal-Pinto, E., London, R. D., Knorr, B. A., & Abramson, R. G. (1995). Reconstitution of  
1091 hepatic uricase in planar lipid bilayer reveals a functional organic anion channel. *J*  
1092 *Membr Biol*, 146(2), 123-132.

1093 Liu, Q., Dahmane, T., Zhang, Z., Assur, Z., Brasch, J., Shapiro, L., Mancina, F., & Hendrickson,  
1094 W. A. (2012). Structures from anomalous diffraction of native biological  
1095 macromolecules. *Science*, 336(6084), 1033-1037. doi:10.1126/science.1218753

1096 Liu, Q., Zhang, Z., & Hendrickson, W. A. (2011). Multi-crystal anomalous diffraction for low-  
1097 resolution macromolecular phasing. *Acta Crystallogr D Biol Crystallogr*, 67(Pt 1), 45-59.  
1098 doi:10.1107/S0907444910046573

1099 Lomize, M. A., Pogozheva, I. D., Joo, H., Mosberg, H. I., & Lomize, A. L. (2012). OPM  
1100 database and PPM web server: resources for positioning of proteins in membranes.  
1101 *Nucleic Acids Res*, 40(Database issue), D370-376. doi:10.1093/nar/gkr703

1102 Loughlin, P., Shelden, M. C., Tierney, M. L., & Howitt, S. M. (2002). Structure and function of a  
1103 model member of the Sulp transporter family. *Cell Biochem Biophys*, 36(2-3), 183-190.  
1104 doi:CBB:36:2-3:183 [pii]  
1105 10.1385/CBB:36:2-3:183

1106 Love, J., Mancina, F., Shapiro, L., Punta, M., Rost, B., Girvin, M., Wang, D. N., Zhou, M., Hunt,  
1107 J. F., Szyperski, T., Gouaux, E., MacKinnon, R., McDermott, A., Honig, B., Inouye, M.,  
1108 Montelione, G., & Hendrickson, W. A. (2010). The New York Consortium on Membrane  
1109 Protein Structure (NYCOMPS): a high-throughput platform for structural genomics of  
1110 integral membrane proteins. *J Struct Funct Genomics*, 11(3), 191-199.  
1111 doi:10.1007/s10969-010-9094-7

1112 Mancina, F., & Love, J. (2011). High throughput platforms for structural genomics of integral  
1113 membrane proteins. *Curr Opin Struct Biol*, 21(4), 517-522. doi:10.1016/j.sbi.2011.07.001

1114 Mansilla, M. C., & de Mendoza, D. (2000). The *Bacillus subtilis* cysP gene encodes a novel  
1115 sulphate permease related to the inorganic phosphate transporter (Pit) family.  
1116 *Microbiology*, 146 ( Pt 4), 815-821.

1117 McCoy, A. J., Grosse-Kunstleve, R. W., Adams, P. D., Winn, M. D., Storoni, L. C., & Read, R.  
1118 J. (2007). Phaser crystallographic software. *Journal of Applied Crystallography*, 40(Pt 4),  
1119 658-674. doi:10.1107/S0021889807021206

1120 Morera, F. J., Vargas, G., Gonzalez, C., Rosenmann, E., & Latorre, R. (2007). Ion-channel  
1121 reconstitution. *Methods Mol Biol*, *400*, 571-585. doi:10.1007/978-1-59745-519-0\_38

1122 Mueller, P., Rudin, D. O., Tien, H. T., & Wescott, W. C. (1962). Reconstitution of cell  
1123 membrane structure in vitro and its transformation into an excitable system. *Nature*, *194*,  
1124 979-980.

1125 Otwinowski, Z., & Minor, W. (1997). Processing of X-ray Diffraction Data Collected in  
1126 Oscillation Mode. *Methods in Enzymology*, *276*, 307-326.

1127 Pape, T., & Schneider, T. R. (2004). HKL2MAP: a graphical user interface for macromolecular  
1128 phasing with SHELX programs. *J. Appl. Cryst.*, *37*, 843-844.

1129 Parra, F., Britton, P., Castle, C., Jones-Mortimer, M. C., & Kornberg, H. L. (1983). Two separate  
1130 genes involved in sulphate transport in Escherichia coli K12. *J Gen Microbiol*, *129*(2),  
1131 357-358.

1132 Pellegrini-Calace, M., Maiwald, T., & Thornton, J. M. (2009). PoreWalker: a novel tool for the  
1133 identification and characterization of channels in transmembrane proteins from their  
1134 three-dimensional structure. *PLoS Comput Biol*, *5*(7), e1000440.  
1135 doi:10.1371/journal.pcbi.1000440

1136 Pettersen, E. F., Goddard, T. D., Huang, C. C., Couch, G. S., Greenblatt, D. M., Meng, E. C., &  
1137 Ferrin, T. E. (2004). UCSF Chimera--a visualization system for exploratory research and  
1138 analysis. *J Comput Chem*, *25*(13), 1605-1612. doi:10.1002/jcc.20084

1139 Punta, M., Love, J., Handelman, S., Hunt, J. F., Shapiro, L., Hendrickson, W. A., & Rost, B.  
1140 (2009). Structural genomics target selection for the New York consortium on membrane  
1141 protein structure. *J Struct Funct Genomics*, *10*(4), 255-268. doi:10.1007/s10969-009-  
1142 9071-1

1143 Quick, M., & Javitch, J. A. (2007). Monitoring the function of membrane transport proteins in  
1144 detergent-solubilized form. *Proc Natl Acad Sci U S A*, *104*(9), 3603-3608.  
1145 doi:0609573104 [pii]  
1146 10.1073/pnas.0609573104

1147 Rapp, M., Granseth, E., Seppala, S., & von Heijne, G. (2006). Identification and evolution of  
1148 dual-topology membrane proteins. *Nat Struct Mol Biol*, *13*(2), 112-116.  
1149 doi:10.1038/nsmb1057

1150 Rigaud, J. L., Pitard, B., & Levy, D. (1995). Reconstitution of membrane proteins into  
1151 liposomes: application to energy-transducing membrane proteins. *Biochim Biophys Acta*,  
1152 *1231*(3), 223-246.

1153 Schrodinger, LLC. (2010). *The PyMOL Molecular Graphics System, Version 1.3r1*.

1154 Sheldrick, G. M. (2010). Experimental phasing with SHELXC/D/E: combining chain tracing  
1155 with density modification. *Acta Crystallogr D Biol Crystallogr*, *66*(Pt 4), 479-485.  
1156 doi:S0907444909038360 [pii]  
1157 [10.1107/S0907444909038360](https://doi.org/10.1107/S0907444909038360)

1158 Sirko, A., Zatyka, M., Sadowy, E., & Hulanicka, D. (1995). Sulfate and thiosulfate transport in  
1159 Escherichia coli K-12: evidence for a functional overlapping of sulfate- and thiosulfate-  
1160 binding proteins. *J Bacteriol*, *177*(14), 4134-4136.

1161 Stein, N. (2008). CHAINSAW: a program for mutating pdb files used as templates in molecular  
1162 replacement. *Journal of Applied Crystallography*, *41*, 641-643.  
1163 doi:10.1107/S0021889808006985

- 1164 Stockbridge, R. B., Kolmakova-Partensky, L., Shane, T., Koide, A., Koide, S., Miller, C., &  
1165 Newstead, S. (2015). Crystal structures of a double-barrelled fluoride ion channel.  
1166 *Nature*, 525(7570), 548-551. doi:10.1038/nature14981
- 1167 Stockbridge, R. B., Robertson, J. L., Kolmakova-Partensky, L., & Miller, C. (2013). A family of  
1168 fluoride-specific ion channels with dual-topology architecture. *Elife*, 2, e01084.  
1169 doi:10.7554/eLife.01084
- 1170 Winn, M. D., Ballard, C. C., Cowtan, K. D., Dodson, E. J., Emsley, P., Evans, P. R., Keegan, R.  
1171 M., Krissinel, E. B., Leslie, A. G., McCoy, A., McNicholas, S. J., Murshudov, G. N.,  
1172 Pannu, N. S., Potterton, E. A., Powell, H. R., Read, R. J., Vagin, A., & Wilson, K. S.  
1173 (2011). Overview of the CCP4 suite and current developments. *Acta Crystallogr D Biol*  
1174 *Crystallogr*, 67(Pt 4), 235-242. doi:10.1107/S0907444910045749
- 1175 Yang, T., Liu, Q., Kloss, B., Bruni, R., Kalathur, R. C., Guo, Y., Kloppmann, E., Rost, B.,  
1176 Colecraft, H. M., & Hendrickson, W. A. (2014). Structure and selectivity in bestrophin  
1177 ion channels. *Science*, 346(6207), 355-359. doi:10.1126/science.1259723
- 1178 Ye, L., Jia, Z., Jung, T., & Maloney, P. C. (2001). Topology of OxlT, the oxalate transporter of  
1179 *Oxalobacter formigenes*, determined by site-directed fluorescence labeling. *J Bacteriol*,  
1180 183(8), 2490-2496. doi:10.1128/JB.183.8.2490-2496.2001
- 1181 Zhang, L., Jiang, W., Nan, J., Almqvist, J., & Huang, Y. (2014). The *Escherichia coli* CysZ is a  
1182 pH dependent sulfate transporter that can be inhibited by sulfite. *Biochim Biophys Acta*,  
1183 1838(7), 1809-1816. doi:10.1016/j.bbamem.2014.03.003
- 1184
